1 **3D *in situ* imaging of female reproductive tract reveals molecular signatures of fertilizing**  
2 **spermatozoa in mice**

3

4 Lukas Ded<sup>1,3</sup>, Jae Yeon Hwang<sup>1</sup>, Kiyoshi Miki<sup>4</sup>, Huanan F. Shi<sup>1</sup>, and Jean-Ju Chung<sup>1,2\*</sup>

5

6 <sup>1</sup>Department of Cellular & Molecular Physiology, <sup>2</sup>Department of Obstetrics, Gynecology, and  
7 Reproductive Sciences, Yale School of Medicine, New Haven, CT, USA. <sup>3</sup>Laboratory of  
8 Reproductive Biology, Institute of Biotechnology CAS, v.v.i., BIOCEV, Vestec, Czech Republic.

9 <sup>4</sup>Boston Children's Hospital, Boston, MA, USA.

10

11 \*Corresponding author: Jean-Ju Chung ([jean-ju.chung@yale.edu](mailto:jean-ju.chung@yale.edu))

12

13 **Abstract**

14 Out of millions of ejaculated sperm, only a few reach the fertilization site in mammals. Flagellar  
15 Ca<sup>2+</sup> signaling nanodomains, organized by multi-subunit CatSper calcium channel complexes,  
16 are pivotal for sperm migration in the female tract, implicating CatSper-dependent mechanisms  
17 in sperm selection. Here, using biochemical and pharmacological studies, we demonstrate that  
18 CatSper1 is an O-linked glycosylated protein, undergoing capacitation-induced processing  
19 dependent on Ca<sup>2+</sup> and phosphorylation cascades. CatSper1 processing correlates with protein  
20 tyrosine phosphorylation (pY) development in sperm cells capacitated *in vitro* and *in vivo*. Using  
21 3D *in situ* molecular imaging and ANN-based automatic detection of sperm distributed along the  
22 cleared female tract, we demonstrate that all spermatozoa past the UTJ possess intact CatSper1  
23 signals. Together, we reveal that fertilizing mouse spermatozoa *in situ* are characterized by intact  
24 CatSper channel, lack of pY, and reacted acrosomes. These findings provide molecular insight  
25 into sperm selection for successful fertilization in the female reproductive tract.

## 26 Introduction

27

28 In most mammals, millions or billions of spermatozoa are deposited into the cervix upon coitus.  
29 Yet less than 100 spermatozoa are found at the fertilization site, called ampulla, and only 10-12  
30 spermatozoa are observed around an oocyte (Kolle, 2015; Suarez, 2002). This implies the  
31 presence of mechanisms to select sperm as they travel through the female reproductive tract and  
32 to eliminate non-fertilizing, surplus spermatozoa once the egg is fertilized (Sakkas et al., 2015).  
33 Recent *ex vivo* imaging studies combined with mouse genetics have shown that surface  
34 molecules on the sperm plasma membranes such as ADAM family proteins are essential for the  
35 sperm to pass through the utero-tubal junction (UTJ) (Fujihara et al., 2018). By contrast, whether  
36 such selection and elimination within the oviduct requires specific molecular signatures and  
37 cellular signaling of spermatozoa is not fully understood.

38

39 Mammalian sperm undergo capacitation, a physiological process to obtain the ability to fertilize  
40 the egg, naturally inside the oviduct (Austin, 1951; Chang, 1951). The emulation of sperm  
41 capacitation *in vitro* led to the development of *in vitro* fertilization (IVF) techniques (Stephens and  
42 Edwards, 1976; Wang and Sauer, 2006). Since then, most studies on sperm capacitation and  
43 gamete interaction have been carried out under *in vitro* conditions. However, mounting evidence  
44 suggests that *in vitro* sperm capacitation does not precisely reproduce the time- and space-  
45 dependent *in vivo* events in the oviduct. Protein tyrosine phosphorylation (pY), which has been  
46 utilized as a hallmark of sperm capacitation over decades, showed different patterns in boar  
47 sperm capacitated *in vitro* from *ex vivo* and *in vivo* (Luno et al., 2013). In mice, pY is not required  
48 for sperm hyperactivation or fertility (Alvau et al., 2016; Tateno et al., 2013). Previous *in vitro*  
49 studies that represent the population average at a given time may or may not have observed  
50 molecular details of a small number of the most fertilizing sperm cells.

51

52 Capacitation involves extensive sperm remodeling that triggers cellular signaling cascades.  
53 Cholesterol shedding and protein modifications occur within the plasma membrane (Visconti et  
54 al., 1999; Vyklicka and Lishko, 2020). Cleavage and/or degradation of intracellular proteins by  
55 individual proteases and ubiquitin-proteasome system (UPS) also participate in the capacitation  
56 process (Honda et al., 2002; Kerns et al., 2016). Various capacitation-associated cellular signaling  
57 pathways that include cAMP/PKA activation followed by pY increase and rise in intracellular pH  
58 and calcium result in physiological outcomes such as acrosome reaction and motility changes  
59 (Balbach et al., 2018; Puga Molina et al., 2018). The sperm-specific CatSper Ca<sup>2+</sup> channel forms  
60 multi-linear nanodomains on the flagellar membrane, functioning as a signaling hub that links  
61 these events and motility regulation during capacitation (Chung et al., 2014). Sperm from mice  
62 lacking CatSper genes are unable to control pY development and fail to migrate past the UTJ  
63 (Chung et al., 2014; Ho et al., 2009). The presence and integrity of CatSper nanodomains, probed  
64 by CatSper1, correlate with sperm ability to develop hyperactivated motility (Chung et al., 2017;  
65 Chung et al., 2014; Hwang et al., 2019). It is not known how these molecular and functional events  
66 are coordinated in the individual sperm cells within the physiological context.

67

68 Here, we reveal that most fertilizing mouse spermatozoa *in situ* are molecularly and functionally  
69 characterized by an intact CatSper channel, lack of pY, and reacted acrosomes. Using

70 biochemical and pharmacological analyses, we show that CatSper1 undergoes O-linked  
71 glycosylation during sperm differentiation and maturation. Capacitation induces CatSper1  
72 cleavage and degradation dependent on  $Ca^{2+}$  influx and protein phosphorylation cascades. We  
73 find that CatSper1 processing correlates with pY development in the flagella among heterogenous  
74 sperm cells capacitated *in vitro* and *in vivo*. We use *ex vivo* imaging and microdissection to show  
75 that intact CatSper channel is indispensable for sperm to successfully reach the ampulla and for  
76 the acrosome to react. Finally, we use newly developed 3D *in situ* molecular imaging strategies  
77 and ANN approach to determine and quantify the molecular characteristics of sperm distributed  
78 along the female reproductive tract. We demonstrate that all spermatozoa past the UTJ are  
79 recognized by intact CatSper1 signals which are graded along the oviduct. These findings provide  
80 molecular insight into dynamic regulation of  $Ca^{2+}$  signaling in selection, maintenance of the  
81 fertilizing capacity, and elimination of sperm in the female reproductive tract.

82

## 83 Results

84

### 85 **CatSper1 undergoes post-translational modifications during sperm development and** 86 **maturation**

87 We previously found that the CatSper channel complex is compartmentalized within flagellar  
88 membrane, creating linear  $Ca^{2+}$  signaling nanodomains along the sperm tail (Chung et al., 2017;  
89 Chung et al., 2014; Hwang et al., 2019). Caveolin-1, a scaffolding protein in cholesterol-rich  
90 microdomains, colocalizes with the CatSper channel complex but does not scaffold the  
91 nanodomain (Chung et al., 2014). The molecular weight and amount of CatSper1, but not the  
92 other CatSper subunits, declines during sperm capacitation (Chung et al., 2014; Figure 1B, D).  
93 To better understand the processing of CatSper1, we first examined CatSper1 protein expression  
94 in the testis and epididymis. Interestingly, the molecular weight of CatSper1 increases gradually  
95 during sperm development and epididymal maturation (Figure 1A; upper), indicating that  
96 CatSper1 undergoes post-translational modifications. We next examined the nature of the  
97 modifications. Block of tyrosine phosphatases by sodium orthovanadate or addition of specific  
98 protein phosphatases, PP1 or PTP, does not change the molecular weight of CatSper1 (Figure1-  
99 figure supplement 1A). In contrast, when sperm membrane was subjected to enzymatic  
100 deglycosylation, O-glycosidase, but not PNGase F, shifts apparent molecular weight of CatSper1  
101 to close to the CatSper1 band with the smallest molecular weight observed in testis (Figure 1A,  
102 B, Figure1-figure supplement 1B). These data suggest that CatSper1 in sperm is not a  
103 phosphoprotein but an O-linked glycosylated protein.

104

### 105 **CatSper1 resides in the subdomains of lipid rafts in mature sperm and processed during** 106 **capacitation**

107 Sucrose density gradient centrifugation identifies CatSper1 in lipid raft subdomains in mature  
108 sperm (Figure 1C). Because cholesterol depletion destabilizes the plasma membrane during  
109 sperm capacitation, one simple hypothesis is that the capacitation-associated changes in raft  
110 stability and distribution (Nixon et al., 2007) render CatSper1 accessible to a protease activity.  
111 Before inducing capacitation, CatSper1 is not processed in sperm cells, probably because the  
112 CatSper1-targeting protease activity is normally not in the immediate vicinity to the CatSper  
113 nanodomains in the flagellar membrane (Figure 1-figure supplement 1C, E). Supporting this

114 notion, the protease activity readily cleaves CatSper1 by solubilizing the sperm membrane  
115 fraction with Triton X-100 (Figure 1-figure supplement 1C).

116

### 117 **The CatSper1 N-terminus undergoes capacitation-associated degradation *in vitro***

118 We next investigated the location of CatSper1 cleavage and degradation using recombinant  
119 CatSper1 proteins and sperm lysates. The CatSper1 antibody used in this study is raised against  
120 the first N-terminal 150 amino acids of recombinant CatSper1 (Ren et al., 2001). C-terminal HA-  
121 tagged full-length (FL) or N-terminal deleted (ND) recombinant CatSper1 are expressed in HEK  
122 293T cells for pull-down and detection by western blot (Figure 1E, F). Solubilized sperm lysates  
123 degrade FL-CatSper1 and result in increased detection of cleaved CatSper1 by HA antibody  
124 (Figure 1G; upper). In contrast, protein levels of recombinant ND-CatSper1 are not affected by  
125 incubation with sperm lysate (Figure 1G; lower). These results demonstrate that the cytoplasmic  
126 N-terminal domain of CatSper1 is the target region for proteolytic activity in sperm cells. How is  
127 the CatSper proteolytic activity regulated?

128

### 129 **CatSper1 degradation involves $Ca^{2+}$ and phosphorylation-dependent protease activity**

130 At the molecular level, capacitation is initiated by  $HCO_3^-$  uptake, which activates soluble adenylyl  
131 cyclase (sAC), resulting in increased cAMP levels.  $HCO_3^-$  also stimulates CatSper-mediated  $Ca^{2+}$   
132 entry into sperm cells by raising intracellular pH (Figure 1-figure supplement 1E). We thus  
133 examined whether the proteolytic activity requires cAMP/PKA and/or  $Ca^{2+}$  signaling pathways.  
134 Interestingly, adding a PKA inhibitor H89 or the St-Ht31 peptide, which abolishes PKA anchoring  
135 to AKAP during sperm capacitation, accelerated CatSper1 degradation during sperm capacitation  
136 (Figure 1H, Figure 1-figure supplement 1D). Consistently, calyculin A, a serine/threonine protein  
137 phosphatase inhibitor, suppresses the capacitation-associated CatSper1 degradation. These  
138 data suggest that regulation of the proteolytic activity targeting CatSper1 involves protein  
139 phosphorylation cascades (Figure 1-figure supplement 1E). Interestingly, adding  $Ca^{2+}$  ionophore  
140 A23178 to the sperm suspension was sufficient to induce CatSper1 processing even under non-  
141 capacitating conditions that do not support changes in PKA activity (Figure 1I, J). Thus, a  $Ca^{2+}$   
142 dependent protease that is indirectly regulated by protein phosphorylation such as calpain (Ono  
143 et al., 2016) may process CatSper1. We observed that calpain inhibitors prevent CatSper1 from  
144 capacitation-associated degradation (Figure 1K).

145

### 146 **CatSper1 degradation correlates with pY development in sperm cells capacitated *in vitro***

147 The presence and integrity of the CatSper nanodomains, probed by CatSper1 antibody, is an  
148 indicator of sperm capability to hyperactivate (Chung et al., 2017; Chung et al., 2014). Inducing  
149 sperm capacitation *in vitro* results in a functionally heterogeneous sperm population in which no  
150 more than ~15% of cells are hyperactivated (Neill and Olds-Clarke, 1987). This is because  
151 individual sperm cells undergo time-dependent changes. The extent to which protein tyrosine  
152 phosphorylation (pY) develops and CatSper1 degrades varies with individual sperm cells  
153 capacitated *in vitro* (Figure 1J, Figure 2A-C). Notably, we find that sperm cells that maintain intact  
154 CatSper1 develop capacitation-associated pY to a lesser degree *in vitro* (Figure 2B, C). This  
155 finding is consistent with the reported phenotype of *CatSper1* knockout sperm that exhibit  
156 potentiated pY during capacitation (Chung et al., 2014). Thus far, our results suggest that *in vitro*  
157 capacitation generates a heterogeneous sperm population in which intact CatSper1 and pY

158 development are inversely correlated in sperm cells at the single cell level. These heterogeneous  
159 sperm cells *in vitro* may reflect a collection of the time- and space-dependent changes that sperm  
160 undergo in the oviduct (Chang and Suarez, 2012; Demott and Suarez, 1992).

161

### 162 **Sperm cells capacitated *in vivo* become heterogeneous along the female tract with distinct** 163 **molecular characteristics**

164 To assess molecular changes of CatSper1 and pY in the spatially distributed sperm populations  
165 along the female reproductive tract, we performed microdissection of the female reproductive tract  
166 mated with *Acr-EGFP/Su9-DsRed2* male mice (Hasuwa et al., 2010) 8 hr post coitus and flushed  
167 out sperm cells from different regions. By subsequent immunostaining, we found that CatSper1  
168 in the spermatozoa that passed the utero-tubal junction (UTJ) are arranged normally along the  
169 tail, mostly protected from degradation, but in decreasing intensity and continuity more towards  
170 UTJ (Figure 2D, Figure 1-figure supplement 1E). In striking contrast, pY is not detected in the  
171 spermatozoa from the ampulla but appears in the oviductal sperm increasingly towards UTJ  
172 (Figure 2E). Absence of EGFP reveals that spermatozoa from the ampulla are fully capacitated  
173 and acrosome reacted (AR) but the those in the isthmus are undergoing AR (Figure 2D, F). *Ex*  
174 *vivo* imaging of *Acr-EGFP/Su9-DsRed* sperm in the reproductive tract removed from mated  
175 female mice reveals segment-specific patterns of the acrosome status (Figure 2F), consistent  
176 with the previous observations that AR initiates in the mid-isthmus (Hino et al., 2016; Muro et al.,  
177 2016) and reacted spermatozoa are able to penetrate the zona *in vivo* (Jin et al., 2011).  
178 Interestingly, we found that a few *CatSper1*<sup>-/-</sup> sperm cells that managed to arrive at the ampulla  
179 are all not acrosome reacted (Figure 2G), supporting the notion that CatSper-mediated Ca<sup>2+</sup>  
180 signaling is required for sperm acrosome reaction (Stival et al., 2018). These results suggest that  
181 escape of CatSper1 from the cleavage and subsequent degradation suppresses pY development,  
182 enabling sperm to maintain hyperactivation capability, prime AR, and achieve the fertilization *in*  
183 *vivo*.

184

### 185 **3D *in situ* molecular imaging of gametes in the female reproductive tract**

186 The physiological importance of tracing a small number of spermatozoa progressing to the  
187 fertilization site prompted us to seek a method that enables direct molecular assessment of single  
188 cells inside the intact female tract. We have adapted tissue clearing technologies to establish  
189 three-dimensional (3D) *in situ* molecular imaging systems for fertilization studies (Figure 3, Figure  
190 3 – figure supplement 1, Videos 1-6). We found that various tissue clearing methods (Chung et  
191 al., 2013; Murray et al., 2015; Yang et al., 2014) are applicable to the reproductive organs from  
192 both male and female mice to preserve gross morphology, and fine cellular and subcellular  
193 structures. The cleared tissues preserved protein-based fluorescence and were compatible with  
194 labeling with dye and antibodies; growing follicles inside the ovary, oviductal folds and multi-  
195 ciliated epithelium, different stages of male germs cells in the seminiferous tubules of the testis  
196 and the epididymis are readily detected after clearing and labeling (Figure 3A-C, Figure 3 – figure  
197 supplement 1, Videos 1-6). 3D volume imaging of the whole cleared female tract well illustrates  
198 the uterine and isthmus mucus and the labyrinths of passages sperm must navigate (Figure 3A,  
199 B, Figure 3 – figure supplement 1B, C, Videos 3, 5, 6). Moreover, 3D rendering of the images and  
200 digital reconstruction of oviductal surface and central lumen depicts continuous and non-disrupted  
201 morphology (Figure 3D, E) consistent with reported dimensions and parameters (Stewart and

202 [Behringer, 2012](#)), validating the integrity of the processed oviduct.

203

204 We next combined tissue clearing with an *in vivo* sperm migration assay ([Chung et al., 2014](#);  
205 [Yamaguchi et al., 2009](#)) to molecularly analyze different sperm populations during the fertilization  
206 process. Among tested clearing methods, we found that passive clearing of CLARITY-processed  
207 reproductive tract from time-mated females retains the location and stability of gametes within the  
208 track past UTJ ([Figure 3F-I](#), Videos 4, 7, 8); whole-animal fixation by trans-cardiac perfusion  
209 perturbs minimally and rapidly arrests all cellular function while tissue-hydrogel matrix fills the  
210 lumen and provides supportive meshwork to prevent gamete loss during subsequent labeling  
211 steps ([Figure 3](#) – figure supplement 2). This new *in situ* imaging platform enables capturing a  
212 moment of sperm-egg interaction; a spermatozoon that approaches a fertilized egg protruding the  
213 2<sup>nd</sup> polar body in the ampulla is detected in a cleared female tract 8 h post coitus immunostained  
214 by acetylated tubulin antibody ([Figure 3F, G](#), Video 7). CatSper1 antibody specifically recognizes  
215 sperm cells transfixed in cleared female tract ([Figure 3H](#)). Tissue clearing allows 3D volume  
216 imaging of the female tract but does not compromise the resolution. Two linear CatSper1 domains  
217 typically observed by confocal imaging are easily observed in the sperm cells inside an ampullar  
218 region of the whole cleared female tract ([Figure 3I](#)). Thus, the integrity of CatSper1 in sperm cells  
219 at different locations along the female tract can be subjected to quantitative analysis.

220

221 **Sperm cell that successfully reach the ampulla are CatSper1-intact and acrosome reacted**

222 With this new imaging strategy to detect sperm cells that remain transfixed in the female tract  
223 ([Figure 3](#)), we investigated acrosome state and CatSper1 integrity in sperm populations directly  
224 from the cleared tract of females 8h after mating, focusing on a few anatomically defined regions  
225 ([Figure 4](#)). Based on the earlier results from micro-dissection or *ex vivo* imaging ([Figure 2D-G](#)),  
226 we anticipated that sperm cells that successfully reach the ampulla would be CatSper1-intact and  
227 acrosome reacted. As expected, most sperm cells located in the ampulla exhibit linearly arranged  
228 intact CatSper1 and reacted acrosomes ([Figure 4A, upper](#), Video 8). In the middle isthmus, both  
229 CatSper1 and acrosome remain intact in most sperm cells, but mixed patterns are observed in  
230 some cells ([Figure 4A, middle](#), Video 8). Interestingly, acrosome is largely intact in the sperm  
231 clusters in the proximal isthmus close to UTJ whereas CatSper1 is barely detected ([Figure 4A,](#)  
232 *lower*, Video 8). This contrasts with the reduced but readily visible CatSper1 in the sperm from  
233 the same region by microdissection ([Figure 2D](#)). It is possible that the relatively longer tissue  
234 processing time and subsequent labeling could have contributed to lower the signal to noise ratio  
235 to a certain degree. Notably, 3D volume imaging of this mid isthmus regions reveals sperm cells  
236 aligned in one direction towards the ampulla, providing unprecedented insight into sperm taxis in  
237 the fertilization process (Video 8). Our qualitative but semi-quantitative analyses suggest that  
238 CatSper1 is largely protected from degradation once in the oviduct; acrosome reaction initiates in  
239 the mid-isthmus and is completed in the ampulla before interacting with the oocytes ([Figure 4B](#)).  
240 These results are consistent with our initial observations from microdissection and *ex vivo* imaging  
241 studies ([Figure 2D, F](#)), validating the information obtained by our *in situ* molecular imaging  
242 platform. Taken together, we conclude that intact CatSper1, lack of pY, and reacted acrosome  
243 are molecular and functional signatures of most fertilizing spermatozoa in the physiological  
244 context.

245

246 **Automatic detection of sperm in the voluminous female tract using artificial neural network**

247 Processing 3D volumetric fluorescent data presents a significant challenge; analyses of sperm in  
248 the female tract includes object identification in the voluminous specimen, object separation from  
249 background noise, and object alignment in three dimensions. To address these logistics  
250 problems, we took an advantage of the artificial neural network (ANN) approach for automatic  
251 localization and signal isolation. We performed a proof-of-principle investigation utilizing CatSper1  
252 distributions in sperm cells from our 3D *in situ* molecular imaging (Figure 5). First, we manually  
253 annotated 3D fluorescent signatures of sperm, somatic nuclei and background noise from the  
254 original images. These signatures were placed in different abundance models in the ANN 3D  
255 training environments (Figure 5A, Figure 5 - figure supplement 1, Video 9) for subsequent ANN  
256 training using MatLab ANN module. We performed a supervised iteration process where the  
257 sperm locations were predefined in the training environments (Figure 5 - figure supplement 2A).  
258 We evaluated the performance of individual ANN according to their sensitivity and specificity in  
259 detecting sperm cells and somatic nuclei, and the abundance (voxel occupancy) of noise (Figure  
260 5B, Figure 5 - figure supplement 2B, C). Detection sensitivity is chosen as a major parameter  
261 used to evaluate the ANN performance in the training environment simulated with the values  
262 similar to those in real samples. The specificity required for sperm detection is lower than the  
263 sensitivity, thus provides mainly empty analytical frames that are easily removed manually. After  
264 iteration and performance evaluation, we selected the best performing ANN and analyzed images  
265 from our experimental samples for which we manually counted sperm number (Figure 5C). The  
266 selected ANN is able to recognize all the sperm detected manually and the ANN sensitivity varies  
267 around 90% in individual samples (Figure 5-figure supplement 2C), validating the ANN  
268 performance. Furthermore, the false-negative detection of sperm all comes from the sperm with  
269 dubious signals in the antecedent human eye evaluation; the 90% of the ANN detected sperm  
270 expresses well recognizable CatSper1 fluorescent staining patterns (Figure 5C, Figure 5-figure  
271 supplement 3A).

272  
273 In order to pair each CatSper1 signal containing tail with the head from the same cell in the  
274 subsequent analysis, we took the reverse approach to the environment production by removing  
275 the detected noise and somatic cell nuclei from the analytical frames (Figure 5-figure supplement  
276 3B). The pre-processed CatSper1 fluorescent signal were then subjected to subsequent  
277 alignment, pattern linearization, and intensity detection (Figure 5D, Figure 5-figure supplement  
278 3C). These steps make possible calculation and visual representation of the fluorescent intensity  
279 parameters along the sperm tail related to their CatSper1 integrity status (Figure 5E-G).

280  
281 **ANN-quantified CatSper1 signal reveals a molecular signature of successful sperm *in situ***

282 The quadrilateral and linear organization of the Ca<sup>2+</sup> signaling nanodomains discovered by super-  
283 resolution imaging of CatSper1 (Figure 6A) is an indicator of a sperm cell's ability to hyperactivate  
284 and fertilize the egg *in vitro* (Chung et al., 2017; Chung et al., 2014). The present study  
285 demonstrates that incubating sperm cell under capacitating conditions *in vitro* induces CatSper1  
286 cleavage and degradation, leading to a heterogeneous sperm population (Figures 1, 2). Building  
287 on our observations of sperm cells from microdissection, *ex vivo* imaging, and CLARITY-based  
288 *in situ* molecular imaging (Figures 2, 3, 4), we hypothesize that CatSper1 is a built-in countdown  
289 timer for sperm death and elimination in the female tract; CatSper1 cleavage and degradation,

290 triggered in a time- and space-dependent manner along the female tract, signals to end sperm  
291 motility, and ultimately sets sperm lifetime *in vivo*. With our newly developed automated ANN  
292 method to obtain high-quality 3D fluorescent images of CatSper1 in the sperm cells from cleared  
293 female tract samples, we further tested this idea by quantitatively analyzing the CatSper1 signals  
294 *in situ*.

295  
296 Our *in situ* imaging platform offers the typical resolution that a confocal microscopy can provide;  
297 two separated CatSper1 arrangement along the sperm tail (Chung et al., 2017) are detected  
298 without any computational processing (Figure 3I, 4A). This encouraged us to develop an analytical  
299 procedure to assess the status of CatSper1 quadrilateral and linear distributions. We isolated the  
300 fluorescent signal from a proximal region of the principal piece close to the annulus where  
301 CatSper1 signal is the most intense (Figure 6B). To superpose the individual cross-sectional  
302 images according to the expected 4 intensity peaks, we aligned randomly oriented transversal-  
303 projection images by placing the quadrant with the highest fluorescent intensity to upper right  
304 corner (Figure 6B, inset). The aligned images were then superposed (Figure 6C) and used for  
305 statistical purposes to represent quadrilateral arrangement of CatSper1 in individual sperm cells  
306 (Figure 6D). The individually processed images of sperm cells from the oviductal regions close to  
307 UTJ, middle isthmus, and ampulla, regions were again superposed to create cumulative diagrams  
308 and heat maps corresponding to these regions (Figure 6E). They show quadrilateral distribution  
309 of enriched CatSper1 signal more clearly from the sperm population in the ampulla compared to  
310 the population in the oviduct close to UTJ (Figure 6E, G, H).

311  
312 To further quantify and statistically analyze our outputs, we divided the pre-processed images of  
313 individual sperm cells on 80 round areas (Figure 6 – figure supplement 1A) and calculated  
314 fluorescent intensities among them. The quantified intensity from the 80 areas were plotted; the  
315 observed 4 peaks (highest intensity) and valleys (lowest intensity) were used to calculate the delta  
316 value among them to represent the quality of CatSper1 quadrilateral structure (Figure 6F). Our  
317 quantitative analysis (Figure 6G, Figure 6 – figure supplement 1B) shows consistent results with  
318 our previous semi-quantitative analysis by manual assignment of the CatSper1 patterns (Figure  
319 4). Together with the whole tissue image processing (Figure 3E), the quantitative analysis clearly  
320 visualizes that sperm populations located along the cleared oviduct have statistically different  
321 CatSper1 quadrilateral intensity delta values (Figure 6H).

322

## 323 Discussion

324

### 325 CatSper1 as a molecular barcode for sperm maturation and transition in the female tract

326 Testicular spermatozoa undergo maturation and biochemical alterations in the intraluminal  
327 environment of the epididymis (Cornwall, 2009). Glycan-modifying enzymes such as glycosidases  
328 and glycosyltransferases are present in the epididymal luminal fluid (Tulsiani, 2003). Here we  
329 have shown that CatSper1 in mouse sperm is an O-linked glycosylated protein with gradually  
330 increasing molecular weight from the testis to the epididymis during male germ-cell development.  
331 The different forms of native CatSper1 may represent different degrees of glycosylation.  
332 Heterologously expressed CatSper1 cannot reach the plasma membrane, remaining instead at  
333 the ER/Golgi (Chung et al., 2017; Chung et al., 2011; Ren et al., 2001). It is intriguing that the



334 molecular weight of recombinant CatSper1 is similar to one of the testicular forms of CatSper1  
335 but bigger than that of the enzymatically deglycosylated and naked polypeptide. O-linked  
336 glycosylation takes place in the cis-Golgi for secreted and transmembrane proteins after the  
337 protein is folded (Rottger et al., 1998), suggesting that additional modification is required for native  
338 CatSper1 to exit the Golgi. Determining the precise identity and modification site may help to  
339 clarify the long-sought functional expression of the CatSper channel in heterologous systems. In  
340 rodents, sialyltransferase displays maturation-associated quantitative changes (Ram et al., 1989;  
341 Scully and Shur, 1988) and sperm lose sialic acid from the surface during capacitation (Ma et al.,  
342 2012). Sperm glycoproteins promote sperm migration and survival in the female reproductive tract  
343 (Ma et al., 2016). We speculate that mature CatSper1 in sperm contains terminal sialic acid  
344 residues, consistent with the small drop in Catsper1 molecular weight during capacitation. The  
345 dynamic sugar modifications on CatSper1 may serve as a binding site for decapacitation factors  
346 and/or a recognition site during capacitation. Supporting this idea, it was previously shown that  
347 mouse sperm lacking CatSper channel cannot pass through the UTJ (Chung et al., 2014; Ho et  
348 al., 2009).

349  
350 Capacitation-associated CatSper1 degradation is blocked by incubation with a 26S proteasome  
351 inhibitor, MG-132 (Chung et al., 2014). Now we show that solubilized sperm membrane fraction  
352 contains additional proteolytic activities that cleave within CatSper1 NTD. The proteolysis is  
353 dependent on  $Ca^{2+}$  entry and PKA phosphorylation cascade. A member of calpains, the  $Ca^{2+}$   
354 dependent modulatory protease family, may cleave CatSper1, as their proteolytic activity can be  
355 positively regulated by PKA (Goll et al., 2003). Among 15 calpain proteins identified in mammals  
356 (Ono et al., 2016), calpain1 and calpain11 were previously detected in our sperm proteome  
357 (Hwang et al., 2019). Intriguingly, we observed that  $Ca^{2+}$  influx by A23187 is sufficient to induce  
358 CatSper1 processing under non-capacitating conditions that do not support PKA activation.  
359 Increased  $Ca^{2+}$  level overrides the phosphorylation effect on calpain1 activity (Du et al., 2018).  
360 Calpain11 might be similarly regulated to calpain1, as their domain structures and catalytic  
361 residues are conserved (Ono et al., 2016). Since recombinant CatSper1 is cleaved more  
362 specifically by sperm lysates, we propose that the testis-specific calpain11 (Ben-Aharon et al.,  
363 2006) may target CatSper1.

364  
365 The effect of CatSper1 truncation on channel activity and sperm motility remains to be determined  
366 in future studies. CatSper1 truncation may be coordinated with molecular changes of other  
367 CatSper subunits. For example, the protein level of CatSper2, but not CatSper3 or 4, also  
368 decreases after capacitation when probed with the antibody recognizing its C-terminal domain  
369 (CTD) (Figure 1; Chung et al., 2014). Since the cytoplasmic modulatory subunits, CatSper $\zeta$  and  
370 Efcab9, mainly interact with the channel pore (Hwang et al., 2019), specific processing of the  
371 intracellular domains of pore subunits could alter the interactions and subsequent channel activity.  
372 Sperm that successfully navigate to the fertilization site in the female reproductive tract and  
373 interact with the egg are recognized by intact CatSper1. CatSper1 processing may lead to a loss  
374 of control in hyperactivation and eventually end sperm life.

375  
376 **Physiological function of capacitation-associated tyrosine phosphorylation and acrosome**  
377 **reaction**

378 An increase in pY is one of the various capacitation-associated parameters observed from *in vitro*  
379 capacitated sperm cells (Visconti et al., 1995). Subsequently, pY was observed in the flagellum  
380 of mouse and human sperm interacting with the oocyte in the medium that supports sperm  
381 capacitation and fertilization *in vitro* (Sakkas et al., 2003; Urner et al., 2001). This correlation of  
382 pY and the zona binding previously established pY as an indicator of successful sperm  
383 capacitation. More recently, however, different observations have been made with *in vivo*  
384 approaches. In sows inseminated close to ovulation, spermatozoa found in the UTJ exhibited  
385 more phosphorylation in the flagella than those bound to oviductal epithelial cells (OEC), where  
386 pY was limited to the equatorial region in the sperm head or no pY was observed (Luno et al.,  
387 2013). In mice, the testis-specific tyrosine kinase, Fer, is demonstrated as a master kinase for  
388 capacitation-associated pY (Alvau et al., 2016). Surprisingly, homozygous *Fer*-mutant male mice  
389 are fertile even though their sperm do not develop pY. All together, these results lead to a new  
390 interpretation of the physiological significance of pY: successful sperm capacitation does not  
391 require pY development. Determining the precise time and place of pY development in sperm *in*  
392 *situ* would help to elucidate its function in sperm capacitation and fertilization. Here we have  
393 shown that sperm, which have capacitated *in vivo* and successfully migrated to the ampulla, are  
394 characterized, not only by intact CatSper1, but also by lack of pY development and reacted  
395 acrosome. These results coincide with our observations from *in vitro* capacitated sperm cells and  
396 other previous studies; pY development inversely correlates with CatSper1 integrity at the single  
397 cell level (Figure 2); genetic and pharmacological ablation of Ca<sup>2+</sup> entry potentiates pY (Chung et  
398 al., 2014; Navarrete et al., 2015); AR occurs in mid-isthmus before contacting an oocyte ZP (Hino  
399 et al., 2016; Jin et al., 2011; Muro et al., 2016).

400  
401 Sperm remaining in the female reproductive tract need to be eliminated after fertilization. They  
402 may undergo apoptosis and phagocytosis in the female reproductive tract (Aitken and Baker,  
403 2013; Chakraborty and Nelson, 1975) and/or become lost in the peritoneal cavity (Mortimer and  
404 Templeton, 1982). pY is reported to mediate apoptosis in immune cells (Yousefi et al., 1994) and  
405 cancer cells (Liu et al., 1994). We propose that capacitation-associated global pY development  
406 represents degenerating sperm which might concomitantly lose motility. It is intriguing that  
407 capacitation-associated reactive oxygen species (ROS) generation activates intrinsic apoptotic  
408 cascade and compromises sperm motility (Koppers et al., 2011). Consistent with this idea, ROS  
409 inactivates protein tyrosine phosphatase (Tonks, 2005) and enhances pY development in sperm  
410 (Aitken et al., 1998). Inhibition of PKA anchoring to AKAPs, which induces CatSper1 truncation  
411 and degradation, also suppresses acrosome reaction in capacitating sperm cells *in vitro* (Stival et  
412 al., 2018). Thus, CatSper-mediated Ca<sup>2+</sup> signaling directly or indirectly contributes to sperm  
413 acrosome reaction in the female tract. Future work will determine molecular mechanisms by which  
414 CatSper channel activity fine-tunes Ca<sup>2+</sup> signaling to regulate hyperactivated motility, as well as  
415 how the Ca<sup>2+</sup> signaling is linked to coordinate acrosome reaction.

416  
417 **New *in situ* molecular imaging platform for the study of fertilization and reproduction**  
418 Successful development of *in vitro* capacitation and fertilization systems provided fundamental  
419 insights into sperm capacitation, fertilization and early embryogenesis. On the other hand, it is  
420 evident that the *in vitro* systems have limitations. Sperm numbers required for IVF are much higher  
421 than those observed at the fertilization site *in vivo* (Suarez, 2006). Sperm capacitated *in vitro* do

422 not encounter the anatomically and spatially distinct environment of the female reproductive tract,  
423 for example, missing their interaction with the oviductal epithelial cells. *In vitro* capacitation also  
424 lacks secretory factors from the male and female reproductive tracts that can affect the surface  
425 protein dynamics during the capacitation process (Flesch and Gadella, 2000). Mouse models that  
426 typically use epididymal sperm for *in vitro* studies do not contain secretions from male glands.  
427 This is in contrast with ejaculated sperm from human and domestic animals. Recent studies have  
428 observed sperm behavior in the physiological context through *ex vivo* imaging of sperm in the  
429 mouse and bovine oviducts under transillumination (Hino and Yanagimachi, 2019; Ishikawa et al.,  
430 2016; Kolle et al., 2009; Muro et al., 2016). Yet this technique is limited in providing molecular  
431 information at a single cell level, as live imaging is not easily amenable to direct molecular labeling  
432 and 3D volume imaging.

433  
434 Here, we report new systems to molecularly examine individual sperm cells capacitated *in vivo*.  
435 Polymerization of the hydrogel-embedded time-mated female reproductive tract followed by  
436 passive clearing provides a stable meshwork to minimally disturb the original location of sperm  
437 cells inside the female tract. This approach allowed us to assess the fine organization of CatSper  
438 nanodomains in the sperm cells distributed along the female reproductive tract. We showed that  
439 both the intensity and the quadrilateral detection of the domains probed by CatSper1 appear as  
440 the common pattern of sperm reaching the ampulla and potentially fertilizing the oocyte. The  
441 experimental outputs complement the molecular and functional information of sperm released  
442 from micro-dissected female tracts and *ex vivo* imaging, identifying molecular and functional  
443 signatures of fertilizing sperm in the physiological context. Furthermore, we demonstrate the  
444 efficacy of topological heat-map representations of cumulative results by automatic sperm  
445 detection and image post-processing and averaging; this method provides statistically robust  
446 presentation and interpretation of the volumetric image data.

447  
448 The present study opens up new horizons to microscopically visualize and analyze molecular  
449 events in single sperm cells that achieve fertilization. This will allow us to better understand  
450 physiologically relevant cellular signaling pathways directly involved in fertilization. We also have  
451 illustrated that the same approach of tissue-clearing based 3D *in situ* molecular imaging is  
452 applicable to study gametogenesis *in situ*. Future areas for investigations as natural extensions  
453 of the current study are gameto-maternal interaction, development, transport, and implantation of  
454 early embryos and maternal-fetal communication. Developing gamete-specific antibodies and/or  
455 knockout validated antibodies to probe molecular abundancy and dynamics *in situ* and post-  
456 processing tools for various parameters will be critical to this end.

457  
458 **Materials and Methods**

459  
460 **Animals**

461 *CatSper1*-null (Ren et al., 2001) and *Su9-DsRed;Acr-EGFP* (Hasuwa et al., 2010) mice were  
462 generated in the previous study and maintained on a C57BL/6 background. *Su9-DsRed;Acr-*  
463 *EGFP* mice were crossbred with *CatSper1*-null mice to generate *Su9-DsRed;Acr-EGFP*  
464 *CatSper1*-null mice. WT C57BL/6 and B6D2F1 male and CD1 female mice were purchased from  
465 Charles River Laboratories (Wilmington, MA) and Jackson laboratory (Bar Harbor, ME). Mice

466 were cared in accordance with guidelines approved by the Yale Animal Care and Use  
467 Committees.

468

### 469 **Mammalian Cell Lines**

470 HEK293T and COS-7 cells were purchased from ATCC. They were cultured in DMEM (GIBCO)  
471 supplemented with 10% FBS (Thermofisher) and 1x Pen/Strep (GIBCO) at 37 °C, 5% CO<sub>2</sub>  
472 condition. Cultured cells were used to express recombinant proteins (HEK293T cells) or make  
473 total cell lysates (COS-7 cells).

474

### 475 **Antibodies and Reagents**

476 In-house rabbit polyclonal CatSper1 (Ren et al., 2001), CatSper3 (Qi et al., 2007), CatSperε  
477 (Chung et al., 2017) antibodies were described previously. Polyclonal CA-IV antibody (M-50) was  
478 purchased from Santacruz. Monoclonal antibodies were purchased from BD Biosciences: anti-  
479 caveolin1 (clone 2297); EMD Millipore: anti-phosphotyrosine (clon4G10,) anti- acetylated tubulin  
480 (clone 6-11B-1), anti-HA agarose (clone HA-7), and Cell Signaling Technology: anti-ubiquitin  
481 (clone P4D1), β-actin (clone 13E5), and HA (clone C29F4) . HRP-conjugated goat anti-rabbit IgG  
482 and goat anti-mouse IgG were from Jackson Immunoresearch. PNA-Alexa 568, WGA-Alexa 555,  
483 WGA-Alexa 647, goat anti-mouse IgG (Alexa 488 or 647), and goat anti-rabbit IgG (Alexa 568 or  
484 Alexa 647) were from Invitrogen. H89, calyculin A, and Ca<sup>2+</sup> ionophore A23178 were purchased  
485 from Calbiochem. ST-Ht31 was from Promega. Calpain inhibitor II and III were from Enzo life  
486 science. All other chemicals were from Sigma-Aldrich unless indicated.

487

### 488 **Epididymal sperm collection and *in vitro* capacitation**

489 Sperm cells were released from caput, corpus, or cauda regions of epididymis in M2 medium  
490 (EMD Millipore). To induce capacitation, sperm from caudal epididymis were incubated in human  
491 tubular fluid (HTF) medium or M16 (EMD Millipore) containing 25 mM sodium bicarbonate at 37  
492 °C, 5% CO<sub>2</sub> condition at 2 x 10<sup>6</sup> cells/ml concentration for indicated time. Sperm cells were  
493 incubated under capacitating conditions with or without the following chemicals: H89 (50 μM), ST-  
494 Ht31 (10 μM), Calyculin A (100 nM), calpain inhibitor I (20 μM), calpain inhibitor II (20 μM), or  
495 calpain inhibitor III (20 μM). Sperm cells suspended in M2 medium (2 x 10<sup>6</sup> cells/ml) were  
496 incubated with A23187 (10 μM) to induce Ca<sup>2+</sup> influx under non-capacitating conditions.

497

### 498 **Molecular Cloning**

499 NEB10β bacterial strain (NEB) was used for the molecular cloning. Genomic regions encoding  
500 full-length (FL, 1-686 aa) and N-terminal domain deleted (ND, 345-686 aa) mouse CatSper1 were  
501 amplified from mouse CatSper1 expression vector (Hwang et al., 2019). The PCR products were  
502 subcloned into pcDNA3.1(-) vector using NEBuilder HiFi DNA Assembly (NEB) to express the  
503 recombinant proteins tagged with HA at C-terminus (*pcDNA3.1(-)-FL-CatSper1-HA* and  
504 *pcDNA3.1(-)-ND-CatSper1-HA*).

505

### 506 **Recombinant protein expression**

507 HEK293T cells were transfected with constructs encoding FL-CatSper1 or ND-CatSper1 to  
508 express the recombinant proteins transiently. Polyethyleneimine was used for the transfection  
509 following the manufacturer's instruction as previously.

510

## 511 **Protein Preparation and Western blot.**

### 512 ***Total Protein Extraction***

513 Total proteins were extracted from sperm, testis, and cultured mammalian cells as previously  
514 described (Hwang et al., 2019). In short, collected epididymal sperm cells were washed with PBS  
515 and lysed in 2X LDS sampling buffer for 10 min at room temperature with agitation (RT). The  
516 whole sperm lysates were centrifuged at 14,000 x g for 10 min at 4 °C. Testes were homogenized  
517 in 0.32M sucrose and centrifuged at 1,000 x g for 10 min at 4 °C to remove cell debris and nuclei.  
518 1% Triton X-100 in PBS containing protease inhibitor cocktail (cOmplete™, EDTA-free, Roche)  
519 was added to the cleared homogenates to make total testis lysate. The lysates were centrifuged  
520 at 4 °C, 14,000 x g for 30 min and the supernatant was used for the downstream experiments.  
521 Transfected HEK29T cells and COS-7 cells were washed and lysed with 1% Triton X-100 in PBS  
522 with protease inhibitor cocktail (Roche) at 4 °C for 1 hr. Cell lysates were centrifuged at 14,000 x  
523 g for 30 min. All the solubilized protein lysates from the sources described above were reduced by  
524 adding dithiothreitol (DTT) to 50 mM and denature by heating at 75 °C for 5 min (testis and  
525 cultured cells) or 10 min (sperm).

526

### 527 ***Discontinuous Sucrose Density Gradient Centrifugation***

528 Discontinuous sucrose density gradient centrifugation was performed as previously described  
529 (Kaneto et al., 2008). To isolate and solubilize membrane fraction without using a detergent,  
530 cauda epididymal sperm cells washed and suspended in PBS ( $1.0 \times 10^8$  cells/ml) were sonicated  
531 3 times for 1 sec each. Sonicated sperm cells were then centrifuged at 5,000 x g for 10 min at 4  
532 °C and the solubilized membrane fraction in supernatant was collected. The solubilized  
533 membrane fraction was pelleted by ultracentrifugation at 100,000 x g for 1 hr at 4 °C and  
534 resuspended with PBS. The membrane suspension was mixed with equal volume of 80 %  
535 sucrose in PBS. A discontinuous sucrose gradient was layered with the 40%, 30 %, and 5 %  
536 sucrose solution from bottom to top in a tube discontinuously. The gradient was ultracentrifuged  
537 at 200,000 x g for 20 hr at 2 °C. Proteins collected from each fraction were precipitated with 5 %  
538 of trichloroacetic acid, ethanol washed, and dissolved in SDS sampling buffer.

539

### 540 ***Dephosphorylation of Sperm Membrane Proteins***

541 Sperm membrane fractions from  $1 \times 10^6$  sperm cells prepared as above were treated with protein  
542 phosphatase 1, (PP1, 0.1 unit; NEB), protein tyrosine phosphatase (PTP, 5 unit; NEB), or sodium  
543 orthovanadate ( $\text{Na}_3\text{VO}_4$ , 1 mM; NEB) to test dephosphorylation of CatSper1. The membrane  
544 fractions were incubated with the phosphatases or  $\text{Na}_3\text{VO}_4$  in a reaction buffer containing 20mM  
545 HEPES, 0.1 mM EDTA and 0.1mM DTT at 30 °C for the indicated times. The isolated sperm  
546 membrane was solubilized by adding Triton X-100 to final 0.1% in PBS (PBS-T) for the indicated  
547 times at RT.

548

### 549 ***Enzymatic Deglycosylation***

550 Glycosylation of CatSper1 from cauda sperm was tested using PNGase F (Sigma-Aldrich) and  
551 O-glycosidase (NEB). Sperm cells were washed with 1x reaction buffer for each enzyme by  
552 centrifugation at 800 x g for 3 min. Sperm pellets were re-suspended with each 1x reaction buffer  
553 (20 mM or 50 mM sodium phosphate, pH7.5 for PNGase F and O-glycosidase, respectively) and

554 followed by sonication and centrifugation to collect sperm membrane fraction as described above.  
555 Collected supernatants were incubated with denaturation buffer at 100 °C for 5 min to denature  
556 glycoproteins before subject to enzymatic deglycosylation. The denatured sperm membrane  
557 fractions were incubated with detergent buffer (0.75% IGEPAL CA for PNGase F; 1% NP-40 for  
558 O-glycosidase) and each glycosidase at 37 °C for 1 hr. All the enzyme-treated samples were  
559 mixed with LDS sampling buffer and denatured after adding DTT to 50 mM at 75 °C for 2 min.

560

#### 561 ***In Vitro* Proteolysis with Sperm Lysate**

562 Proteolysis of the recombinant CatSper1 protein by sperm lysate were performed as previously  
563 described (Chung et al., 2014). Solubilized recombinant FL-CatSper1 and ND-CatSper1 were  
564 pulled-down with anti-HA agarose (EMD Millipore) for 1 hr at RT. The enriched recombinant  
565 proteins were incubated with 30 µl of sperm lysates solubilized from  $3.0 \times 10^5$  sperm cells at 37  
566 °C for the indicated times. Sperm lysates were prepared by sonication and incubation in PBS-T  
567 without protease inhibitor at 4 °C for 1 hr. After the incubation, mixture of recombinant protein and  
568 sperm lysates were mixed to 2X LDS sampling buffer and denatured by adding DTT to 50 mM at  
569 75 °C for 10 min.

570

#### 571 **Western Blot**

572 Denatured protein samples were subjected to SDS-PAGE. Rabbit polyclonal CatSper1 (2 µg/ml),  
573 CatSper3 (2 µg/ml), CatSper $\epsilon$  (1.6 µg/ml), and CAIV (1:500) antibodies and monoclonal HA (clone  
574 C29F4; 1:2,000), caveolin1 (clone 2297, 1:500), acetylated tubulin (clone 6-11B-1; 1:20,000),  
575 phosphotyrosine (clone 4G10; 1:1,000), and ubiquitin (clone P4D1; 1:1,000) antibodies were used  
576 for western blot. Anti-mouse IgG-HRP (1:10,000) and anti-rabbit IgG-HRP (1:10,000) were used  
577 for secondary antibodies.

578

#### 579 **Sperm Migration assay**

580 Sperm migration assay was performed as previously described (Chung et al., 2014). Briefly,  
581 female mice were introduced to single-caged *Su9-DsRed;Acr-EGFP* males for 30 min and  
582 checked for vaginal plug. Whole female reproductive tracts were collected 8 h post-coitus and  
583 subjected to *ex vivo* imaging to examine spermatozoa expressing reporter genes in the tract  
584 (Eclipse TE2000-U, Nikon).

585

#### 586 **Collection of *in vivo* Capacitated Sperm**

587 Female reproductive tracts from timed-mated females to *Su9-DsRed;Acr-EGFP* or *Su9-*  
588 *DsRed;Acr-EGFP CatSper1*-null males were collected 8 h post coitus. Sperm cells were released  
589 by micro-dissection of female reproductive tract followed by lumen flushing of each tubal segment  
590 (cut into ~ 1-2 mm pieces). Each piece was placed in 50 µl of PBS on glass coverslips and the  
591 intraluminal materials were fixed immediately by air-dry followed by 4% PFA in PBS. Ampulla and  
592 uterine tissue close to UTJ were placed in 100 µl of PBS and vortexed briefly to release the sperm  
593 within the tissues. Fixed sperm cells were subjected to immunostaining.

594

#### 595 **Sperm immunocytochemistry**

596 Non-capacitated or *in vitro* capacitated sperm cells on glass coverslips were washed with PBS  
597 and fixed with 4% paraformaldehyde (PFA) in PBS at RT for 10 minutes. Fixed samples were

598 permeabilization with PBS-T for 10 min and blocked with 10% normal goat serum in PBS for 1 hr  
599 at RT. Blocked sperm cells were stained with primary antibodies, anti-CatSper1 (10  $\mu$ g/ml) and  
600 anti-phosphotyrosine (1:1,000), at 4 °C for overnight, followed by staining with secondary  
601 antibodies for 1 hr at RT. Hoechst was used for counterstaining sperm head. Sperm cells were  
602 mounted (Vectashield, Vector Laboratories) and imaged with confocal microscopes (Zeiss  
603 LSM710 Elyra P1 and Olympus Fluoview 1000).

604

## 605 **Tissue clearing and molecular labeling of the cleared tissues**

### 606 CLARITY

607 All 3D volume images from the main figures (Figures 3 and 4) were taken from female tracts  
608 subjected to CLARITY method (Chung et al., 2013) with slight modification by clearing tissue-  
609 hydrogel passively without involving electrophoresis. Timed-mated females (8 h post coitus) and  
610 males were subjected to transcardiac perfusion using peristaltic pump. The mice were perfused  
611 with each 20 ml of ice-cold PBS followed by freshly prepared hydrogel monomer solution (4%  
612 acrylamide, 2% Bis-acrylamide, 0.25% Azo-inhibitor (VA-044, Wako), 4% PFA in PBS). The whole  
613 female tract or testis-hydrogel were dissected from animals after perfusion and placed in 10 ml of  
614 fresh hydrogel monomer solution for post-fixation. The collected tissues in monomer solution were  
615 heated at 37 °C with degassing for 15 min, followed by incubation at 37 °C for 2-3 h for tissue  
616 gelation. The gelated tissues were washed with clearing solution containing 200 mM boric acid  
617 and 4% sodium dodecyl sulfate (pH8.5) three times for 24 h each by gentle rocking at 55 °C.  
618 Cleared tissues were further washed with PBS-T for 24 h. The cleared female tracts were  
619 subjected to dye- and/or immunolabeling: the cleared tissues were incubated with CatSper1 (7  
620  $\mu$ g/ml) or AcTub (1:100) antibodies in PBS-T for overnight at RT, followed by washing with PBS-  
621 T for 24 h. Washed samples were stained with the secondary antibodies (1:500) overnight.  
622 Fluorescence dye conjugated PNA or WGA were used to detect sugar residues (1:1,000) and  
623 DAPI were used for counter staining (1:1000) in PBS-T. Stained tissues were washed and  
624 refractive index matched in RIMS solution (Chung et al., 2013) overnight. The index-matched  
625 samples were put on imaging chamber filled with RIMS solution and imaged. All cleared tissues  
626 were imaged with laser scanning microscope (Zeiss LSM710 Elyra P1). EC plan-Neofluar 10x/0.3,  
627 LD LCI Plan-Apochromat 40x1.2, and Plan-Apochromat 63x/1.4 objectives were used for imaging.  
628 Tile scanning and z-stacking for volume imaging were carried out with functions incorporated in  
629 Zen black 2012 SP2 (Carl Zeiss) and Zen blue 2011 SP1 software (Carl Zeiss) was used for 3D  
630 rendering.

### 631 X-CLARITY

632 Ovary, testis, and epididymis images (Figure 3 – figure supplement 1A, D-I) were taken from X-  
633 CLARITY method, following manufacturer's instruction (Logos biosystems). Animals  
634 transcardially fixed with 4% PFA were post fixed in the fresh fixative for 4-6 h. The post-fixed  
635 tissues were then immersed in a modified hydrogel solution (4% acrylamide, 0.25% Azo-inhibitor  
636 (VA-044, Wako), 4% PFA in PBS) for 4-6 h. The samples were degassed and polymerized as  
637 described in CLARITY method. The gelated tissues were washed with PBS and placed in  
638 electrophoretic tissue clearing (ETC) chamber. Tissues in the ETC chamber were cleared by  
639 clearing solution described above with active electrophoretic forcing of tissue for 6-8 hr. Cleared  
640 tissues were washed and stained with  $\beta$ -actin and WGA.

### 641 FACT-PRESTO

642 3D volume images of the oviduct and UTJ (Figure 3 – figure supplement 1B, C) were obtained  
643 from the female tract cleared by modified passive ACT-PRESTO (Lee et al., 2016) without  
644 involving electrophoretic clearing. In brief, female tracts were fixed in 4% PFA by transcardiac  
645 perfusion, followed by post-fixation in fresh fixative solution for 4-6 hours at 4 °C. The post-fixed  
646 samples were incubated in the modified hydrogel monomer solution without additional fixative  
647 (4% acrylamide, 0.25% Azo-inhibitor in PBS) 4-6 hours at 4 °C. The samples were degassed and  
648 polymerized at 37 °C as described in CLARITY method. Hydrogel-infused tissues were cleared  
649 with the clearing solution. The cleared tissues were washed with PBS overnight at RT and  
650 facilitated labeling is achieved by vacuum-applied negative pressure.

#### 651 SWITCH

652 3D volume images of testis (Figure 3 – figure supplement 1F) were taken from male mice  
653 transcardially perfused and cleared by SWITCH method (Murray et al., 2015). Fixed testes by  
654 SWITCH fixative (4% PFA, 1% glutaraldehyde (GA) in PBS) were washed with PBS-T and  
655 quenched by 4% glycine and 4% acetamide in PBS at 37 °C for overnight. The quenched samples  
656 were passively cleared with SWITCH solution (200 mM SDS, 20 mM Na<sub>2</sub>SO<sub>3</sub>, 10 mM NaOH, pH  
657 9.0) 2 times at 60 °C for 3 h each. The cleared tissues were washed with PBS-T for 12-24 h at 37  
658 °C and incubated with refraction index-matching solution (RIMS: 29.4% diatrizoic acid, 23.5% n-  
659 methyl-d-glucamine, 32.4% iodixanol). The index matched samples were mounted and imaged.

660

#### 661 **Artificial neural network (ANN) image processing**

662 The overall strategy for the artificial neural network (ANN) image processing is described in Figure  
663 4 – figure supplement 2A. The individual signal patterns (sperm, somatic cell nuclei, and noise)  
664 were isolated from the original volume images using Zen Blue (Carl Zeiss) and IMARIS software  
665 (Oxford instruments) and exported as .obj/.fbx files. The isolated signal patterns were used to  
666 generate 3D training environments for ANN by importing different abundancies of the individual  
667 components (Figure 4 – Supplementary figure 1) to the 3D environment operating system,  
668 Blender 2.79 (<https://www.blender.org/>); the individual 3D training environment (~10<sup>4</sup>) generated  
669 together with the exactly defined coordinates of individual components were exported as  
670 .obj/.fbx/Notepad++ files. The ANN training environments were used to develop the ANN  
671 detecting the sperm *in situ*. The ANN training was carried out using MATLAB 9.3 (R2017b)  
672 software ANN toolbox. The input to the ANN would be virtual z-stacks of the produced training  
673 environments. The isolated sperm signal patterns were used as as target signature. The  
674 supervised training process was performed by comparing the vector coordinates of the individual  
675 sperm signatures in the output with the pre-defined vector coordinates of the signatures in the  
676 input. This approach also enabled us to evaluate the ANN performance and to quantify signature  
677 detection sensitivity and specificity. ANNs with the best performance in detecting the sperm  
678 signature were subsequently applied to detect the sperm fluorescent signatures and their post-  
679 processing in real volumetric data. In the real environments, selected ANNs showed both  
680 sensitivity and specificity around 90%.

681

#### 682 **Statistical analyses**

683 Statistical analyses were carried out with one-way analysis of variance (ANOVA) with Tukey post  
684 hoc test. Differences were considered significant at p<0.05. For ANN analysis, both parametric  
685 (ANOVA; Tukey post hoc) and non-parametric (KW-ANOVA) tests were carried out to evaluate



686 the presented differences; both tests resulted in the same significance output with differences  
687 considered significant at  $p < 0.05$ .

688

### 689 **Acknowledgements**

690 We thank David E. Clapham for sharing reagents and resources, Kwanghun Chung for  
691 discussions on tissue clearing methods, Logos Biosystems for use of X-CLARITY system, and  
692 Luke L. McGoldrick for critical reading of the draft. This work was supported by start-up funds  
693 from Yale University School of Medicine, a Yale Goodman-Gilman Scholar Award-2015, and NIH  
694 R01HD096745 to J.-J.C. and by Male Contraceptive Initiative post-doctoral fellowship to J.Y.H.

695

### 696 **Competing interests**

697 The authors declare that no competing interests exists.

## 698 References

- 699
- 700 Aitken, R., Harkiss, D., Knox, W., Paterson, M., and Irvine, D. (1998). A novel signal transduction cascade  
701 in capacitating human spermatozoa characterised by a redox-regulated, cAMP-mediated induction of  
702 tyrosine phosphorylation. *Journal of Cell Science* *111*, 645-656.
- 703 Aitken, R.J., and Baker, M.A. (2013). Oxidative stress, spermatozoa and leukocytic infiltration:  
704 relationships forged by the opposing forces of microbial invasion and the search for perfection. *Journal*  
705 *of reproductive immunology* *100*, 11-19.
- 706 Alvau, A., Battistone, M.A., Gervasi, M.G., Navarrete, F.A., Xu, X., Sanchez-Cardenas, C., De la Vega-  
707 Beltran, J.L., Da Ros, V.G., Greer, P.A., Darszon, A., *et al.* (2016). The tyrosine kinase FER is responsible  
708 for the capacitation-associated increase in tyrosine phosphorylation in murine sperm. *Development* *143*,  
709 2325-2333.
- 710 Austin, C.R. (1951). Observations on the penetration of the sperm in the mammalian egg. *Aust J Sci Res*  
711 *B 4*, 581-596.
- 712 Balbach, M., Beckert, V., Hansen, J.N., and Wachten, D. (2018). Shedding light on the role of cAMP in  
713 mammalian sperm physiology. *Mol Cell Endocrinol* *468*, 111-120.
- 714 Ben-Aharon, I., Brown, P.R., Shalgi, R., and Eddy, E.M. (2006). Calpain 11 is unique to mouse  
715 spermatogenic cells. *Molecular Reproduction and Development: Incorporating Gamete Research* *73*,  
716 767-773.
- 717 Chakraborty, J., and Nelson, L. (1975). Fate of surplus sperm in the fallopian tube of the white mouse.  
718 *Biol Reprod* *12*, 455-463.
- 719 Chang, H., and Suarez, S.S. (2012). Unexpected flagellar movement patterns and epithelial binding  
720 behavior of mouse sperm in the oviduct. *Biology of reproduction* *86*, 140, 141-148.
- 721 Chang, M.C. (1951). Fertilizing capacity of spermatozoa deposited into the fallopian tubes. *Nature* *168*,  
722 697-698.
- 723 Chung, J.J., Miki, K., Kim, D., Shim, S.H., Shi, H.F., Hwang, J.Y., Cai, X., Iseri, Y., Zhuang, X., and Clapham,  
724 D.E. (2017). CatSperzeta regulates the structural continuity of sperm Ca(2+) signaling domains and is  
725 required for normal fertility. *Elife* *6*.
- 726 Chung, J.J., Navarro, B., Krapivinsky, G., Krapivinsky, L., and Clapham, D.E. (2011). A novel gene required  
727 for male fertility and functional CATSPER channel formation in spermatozoa. *Nat Commun* *2*, 153.
- 728 Chung, J.J., Shim, S.H., Everley, R.A., Gygi, S.P., Zhuang, X., and Clapham, D.E. (2014). Structurally distinct  
729 Ca(2+) signaling domains of sperm flagella orchestrate tyrosine phosphorylation and motility. *Cell* *157*,  
730 808-822.
- 731 Chung, K., Wallace, J., Kim, S.-Y., Kalyanasundaram, S., Andalman, A.S., Davidson, T.J., Mirzabekov, J.J.,  
732 Zalocusky, K.A., Mattis, J., and Denisin, A.K. (2013). Structural and molecular interrogation of intact  
733 biological systems. *Nature* *497*, 332-337.
- 734 Cornwall, G.A. (2009). New insights into epididymal biology and function. *Human reproduction update*  
735 *15*, 213-227.
- 736 Demott, R.P., and Suarez, S.S. (1992). Hyperactivated sperm progress in the mouse oviduct. *Biology of*  
737 *reproduction* *46*, 779-785.
- 738 Du, M., Li, X., Li, Z., Shen, Q., Wang, Y., Li, G., and Zhang, D. (2018). Phosphorylation regulated by protein  
739 kinase A and alkaline phosphatase play positive roles in  $\mu$ -calpain activity. *Food chemistry* *252*, 33-39.
- 740 Flesch, F.M., and Gadella, B.M. (2000). Dynamics of the mammalian sperm plasma membrane in the  
741 process of fertilization. *Biochimica et Biophysica Acta (BBA)-Reviews on Biomembranes* *1469*, 197-235.
- 742 Fujihara, Y., Miyata, H., and Ikawa, M. (2018). Factors controlling sperm migration through the oviduct  
743 revealed by gene-modified mouse models. *Exp Anim* *67*, 91-104.
- 744 Goll, D.E., Thompson, V.F., Li, H., Wei, W., and Cong, J. (2003). The calpain system. *Physiological reviews*.

745 Hasuwa, H., Muro, Y., Ikawa, M., Kato, N., Tsujimoto, Y., and Okabe, M. (2010). Transgenic mouse sperm  
746 that have green acrosome and red mitochondria allow visualization of sperm and their acrosome  
747 reaction in vivo. *Experimental animals* *59*, 105-107.

748 Hino, T., Muro, Y., Tamura-Nakano, M., Okabe, M., Tateno, H., and Yanagimachi, R. (2016). The Behavior  
749 and Acrosomal Status of Mouse Spermatozoa In Vitro, and Within the Oviduct During Fertilization after  
750 Natural Mating. *Biol Reprod* *95*, 50.

751 Hino, T., and Yanagimachi, R. (2019). Active peristaltic movements and fluid production of the mouse  
752 oviduct: their roles in fluid and sperm transport and fertilization. *Biol Reprod* *101*, 40-49.

753 Ho, K., Wolff, C.A., and Suarez, S.S. (2009). CatSper-null mutant spermatozoa are unable to ascend  
754 beyond the oviductal reservoir. *Reprod Fertil Dev* *21*, 345-350.

755 Honda, A., Siruntawineti, J., and Baba, T. (2002). Role of acrosomal matrix proteases in sperm–zona  
756 pellucida interactions. *Human Reproduction Update* *8*, 405-412.

757 Hwang, J.Y., Mannowetz, N., Zhang, Y., Everley, R.A., Gygi, S.P., Bewersdorf, J., Lishko, P.V., and Chung,  
758 J.J. (2019). Dual Sensing of Physiologic pH and Calcium by EFCAB9 Regulates Sperm Motility. *Cell* *177*,  
759 1480-1494 e1419.

760 Ishikawa, Y., Usui, T., Yamashita, M., Kanemori, Y., and Baba, T. (2016). Surfing and Swimming of  
761 Ejaculated Sperm in the Mouse Oviduct. *Biol Reprod* *94*, 89.

762 Jin, M., Fujiwara, E., Kakiuchi, Y., Okabe, M., Satouh, Y., Baba, S.A., Chiba, K., and Hirohashi, N. (2011).  
763 Most fertilizing mouse spermatozoa begin their acrosome reaction before contact with the zona  
764 pellucida during in vitro fertilization. *Proc Natl Acad Sci U S A* *108*, 4892-4896.

765 Kaneto, M., Krisfalusi, M., Eddy, E.M., O'Brien, D.A., and Miki, K. (2008). Bicarbonate-induced  
766 phosphorylation of p270 protein in mouse sperm by cAMP-dependent protein kinase. *Mol Reprod Dev*  
767 *75*, 1045-1053.

768 Kerns, K., Morales, P., and Sutovsky, P. (2016). Regulation of Sperm Capacitation by the 26S Proteasome:  
769 An Emerging New Paradigm in Spermatology. *Biol Reprod* *94*, 117.

770 Kolle, S. (2015). Transport, Distribution and Elimination of Mammalian Sperm Following Natural Mating  
771 and Insemination. *Reprod Domest Anim* *50 Suppl 3*, 2-6.

772 Kolle, S., Dubielzig, S., Reese, S., Wehrend, A., Konig, P., and Kummer, W. (2009). Ciliary transport,  
773 gamete interaction, and effects of the early embryo in the oviduct: ex vivo analyses using a new digital  
774 videomicroscopic system in the cow. *Biol Reprod* *81*, 267-274.

775 Koppers, A.J., Mitchell, L.A., Wang, P., Lin, M., and Aitken, R.J. (2011). Phosphoinositide 3-kinase  
776 signalling pathway involvement in a truncated apoptotic cascade associated with motility loss and  
777 oxidative DNA damage in human spermatozoa. *Biochemical Journal* *436*, 687-698.

778 Lee, E., Choi, J., Jo, Y., Kim, J.Y., Jang, Y.J., Lee, H.M., Kim, S.Y., Lee, H.J., Cho, K., Jung, N., *et al.* (2016).  
779 ACT-PRESTO: Rapid and consistent tissue clearing and labeling method for 3-dimensional (3D) imaging.  
780 *Sci Rep* *6*, 18631.

781 Liu, Y., Bhalla, K., Hill, C., and Prlest, D.G. (1994). Evidence for involvement of tyrosine phosphorylation  
782 in taxol-induced apoptosis in a human ovarian tumor cell line. *Biochemical pharmacology* *48*, 1265-1272.

783 Luno, V., Lopez-Ubeda, R., Garcia-Vazquez, F.A., Gil, L., and Matas, C. (2013). Boar sperm tyrosine  
784 phosphorylation patterns in the presence of oviductal epithelial cells: in vitro, ex vivo, and in vivo  
785 models. *Reproduction* *146*, 315-324.

786 Ma, F., Wu, D., Deng, L., Secrest, P., Zhao, J., Varki, N., Lindheim, S., and Gagneux, P. (2012). Sialidases  
787 on mammalian sperm mediate deciduous sialylation during capacitation. *Journal of Biological Chemistry*  
788 *287*, 38073-38079.

789 Ma, X., Pan, Q., Feng, Y., Choudhury, B.P., Ma, Q., Gagneux, P., and Ma, F. (2016). Sialylation facilitates  
790 the maturation of mammalian sperm and affects its survival in female uterus. *Biology of reproduction*  
791 *94*, 123, 121-110.

792 Mortimer, D., and Templeton, A. (1982). Sperm transport in the human female reproductive tract in  
793 relation to semen analysis characteristics and time of ovulation. *Reproduction* 64, 401-408.

794 Muro, Y., Hasuwa, H., Isotani, A., Miyata, H., Yamagata, K., Ikawa, M., Yanagimachi, R., and Okabe, M.  
795 (2016). Behavior of Mouse Spermatozoa in the Female Reproductive Tract from Soon after Mating to  
796 the Beginning of Fertilization. *Biol Reprod* 94, 80.

797 Murray, E., Cho, J.H., Goodwin, D., Ku, T., Swaney, J., Kim, S.-Y., Choi, H., Park, Y.-G., Park, J.-Y., and  
798 Hubbert, A. (2015). Simple, scalable proteomic imaging for high-dimensional profiling of intact systems.  
799 *Cell* 163, 1500-1514.

800 Navarrete, F.A., Garcia-Vazquez, F.A., Alvau, A., Escoffier, J., Krapf, D., Sanchez-Cardenas, C., Salicioni,  
801 A.M., Darszon, A., and Visconti, P.E. (2015). Biphasic role of calcium in mouse sperm capacitation  
802 signaling pathways. *J Cell Physiol* 230, 1758-1769.

803 Neill, J.M., and Olds-Clarke, P. (1987). A computer-assisted assay for mouse sperm hyperactivation  
804 demonstrates that bicarbonate but not bovine serum albumin is required. *Gamete research* 18, 121-  
805 140.

806 Nixon, B., Aitken, R.J., and McLaughlin, E.A. (2007). New insights into the molecular mechanisms of  
807 sperm-egg interaction. *Cell Mol Life Sci* 64, 1805-1823.

808 Ono, Y., Saido, T.C., and Sorimachi, H. (2016). Calpain research for drug discovery: challenges and  
809 potential. *Nature Reviews Drug Discovery* 15, 854.

810 Puga Molina, L.C., Luque, G.M., Balestrini, P.A., Marin-Briggiler, C.I., Romarowski, A., and Buffone, M.G.  
811 (2018). Molecular Basis of Human Sperm Capacitation. *Front Cell Dev Biol* 6, 72.

812 Qi, H., Moran, M.M., Navarro, B., Chong, J.A., Krapivinsky, G., Krapivinsky, L., Kirichok, Y., Ramsey, I.S.,  
813 Quill, T.A., and Clapham, D.E. (2007). All four CatSper ion channel proteins are required for male fertility  
814 and sperm cell hyperactivated motility. *Proc Natl Acad Sci U S A* 104, 1219-1223.

815 Ram, P.A., Cardullo, R.A., and Millette, C.F. (1989). Expression and topographical localization of cell  
816 surface fucosyltransferase activity during epididymal sperm maturation in the mouse. *Gamete research*  
817 22, 321-332.

818 Ren, D., Navarro, B., Perez, G., Jackson, A.C., Hsu, S., Shi, Q., Tilly, J.L., and Clapham, D.E. (2001). A sperm  
819 ion channel required for sperm motility and male fertility. *Nature* 413, 603-609.

820 Rottger, S., White, J., Wandall, H.H., Olivo, J.-C., Stark, A., Bennett, E.P., Whitehouse, C., Berger, E.G.,  
821 Clausen, H., and Nilsson, T. (1998). Localization of three human polypeptide GalNAc-transferases in HeLa  
822 cells suggests initiation of O-linked glycosylation throughout the Golgi apparatus. *Journal of Cell Science*  
823 111, 45-60.

824 Sakkas, D., Leppens-Luisier, G., Lucas, H., Chardonens, D., Campana, A., Franken, D., and Urner, F.  
825 (2003). Localization of tyrosine phosphorylated proteins in human sperm and relation to capacitation  
826 and zona pellucida binding. *Biology of reproduction* 68, 1463-1469.

827 Sakkas, D., Ramalingam, M., Garrido, N., and Barratt, C.L. (2015). Sperm selection in natural conception:  
828 what can we learn from Mother Nature to improve assisted reproduction outcomes? *Hum Reprod*  
829 Update 21, 711-726.

830 Scully, N.F., and Shur, B.D. (1988). Stage-specific increase in cell surface galactosyltransferase activity  
831 during spermatogenesis in mice bearing t alleles. *Developmental biology* 125, 195-199.

832 Steptoe, P.C., and Edwards, R.G. (1976). Reimplantation of a human embryo with subsequent tubal  
833 pregnancy. *Lancet* 1, 880-882.

834 Stewart, C.A., and Behringer, R.R. (2012). Mouse oviduct development. In *Mouse Development*  
835 (Springer), pp. 247-262.

836 Stival, C., Ritagliati, C., Xu, X., Gervasi, M.G., Luque, G.M., Baro Graf, C., De la Vega-Beltran, J.L., Torres,  
837 N., Darszon, A., Krapf, D., *et al.* (2018). Disruption of protein kinase A localization induces acrosomal  
838 exocytosis in capacitated mouse sperm. *J Biol Chem* 293, 9435-9447.

839 Suarez, S. (2006). Interactions of spermatozoa with the female reproductive tract: inspiration for  
840 assisted reproduction. *Reproduction, Fertility and Development* *19*, 103-110.

841 Suarez, S.S. (2002). Formation of a reservoir of sperm in the oviduct. *Reprod Domest Anim* *37*, 140-143.

842 Tateno, H., Krapf, D., Hino, T., Sanchez-Cardenas, C., Darszon, A., Yanagimachi, R., and Visconti, P.E.  
843 (2013). Ca<sup>2+</sup> ionophore A23187 can make mouse spermatozoa capable of fertilizing in vitro without  
844 activation of cAMP-dependent phosphorylation pathways. *Proc Natl Acad Sci U S A* *110*, 18543-18548.

845 Tonks, N.K. (2005). Redox redux: revisiting PTPs and the control of cell signaling. *Cell* *121*, 667-670.

846 Tulsiani, D.R. (2003). Glycan modifying enzymes in luminal fluid of rat epididymis: are they involved in  
847 altering sperm surface glycoproteins during maturation? *Microscopy research and technique* *61*, 18-27.

848 Urner, F., Leppens-Luisier, G., and Sakkas, D. (2001). Protein tyrosine phosphorylation in sperm during  
849 gamete interaction in the mouse: the influence of glucose. *Biology of reproduction* *64*, 1350-1357.

850 Visconti, P.E., Bailey, J.L., Moore, G.D., Pan, D., Olds-Clarke, P., and Kopf, G.S. (1995). Capacitation of  
851 mouse spermatozoa. I. Correlation between the capacitation state and protein tyrosine  
852 phosphorylation. *Development* *121*, 1129-1137.

853 Visconti, P.E., Ning, X., Fornes, M.W., Alvarez, J.G., Stein, P., Connors, S.A., and Kopf, G.S. (1999).  
854 Cholesterol efflux-mediated signal transduction in mammalian sperm: cholesterol release signals an  
855 increase in protein tyrosine phosphorylation during mouse sperm capacitation. *Dev Biol* *214*, 429-443.

856 Vyklicka, L., and Lishko, P.V. (2020). Dissecting the signaling pathways involved in the function of sperm  
857 flagellum. *Curr Opin Cell Biol* *63*, 154-161.

858 Wang, J., and Sauer, M.V. (2006). In vitro fertilization (IVF): a review of 3 decades of clinical innovation  
859 and technological advancement. *Therapeutics and clinical risk management* *2*, 355.

860 Yamaguchi, R., Muro, Y., Isotani, A., Tokuhira, K., Takumi, K., Adham, I., Ikawa, M., and Okabe, M.  
861 (2009). Disruption of ADAM3 impairs the migration of sperm into oviduct in mouse. *Biol Reprod* *81*, 142-  
862 146.

863 Yang, B., Treweek, J.B., Kulkarni, R.P., Deverman, B.E., Chen, C.-K., Lubeck, E., Shah, S., Cai, L., and  
864 Gradinaru, V. (2014). Single-cell phenotyping within transparent intact tissue through whole-body  
865 clearing. *Cell* *158*, 945-958.

866 Yousefi, S., Green, D.R., Blaser, K., and Simon, H.-U. (1994). Protein-tyrosine phosphorylation regulates  
867 apoptosis in human eosinophils and neutrophils. *Proceedings of the National Academy of Sciences* *91*,  
868 10868-10872.

869

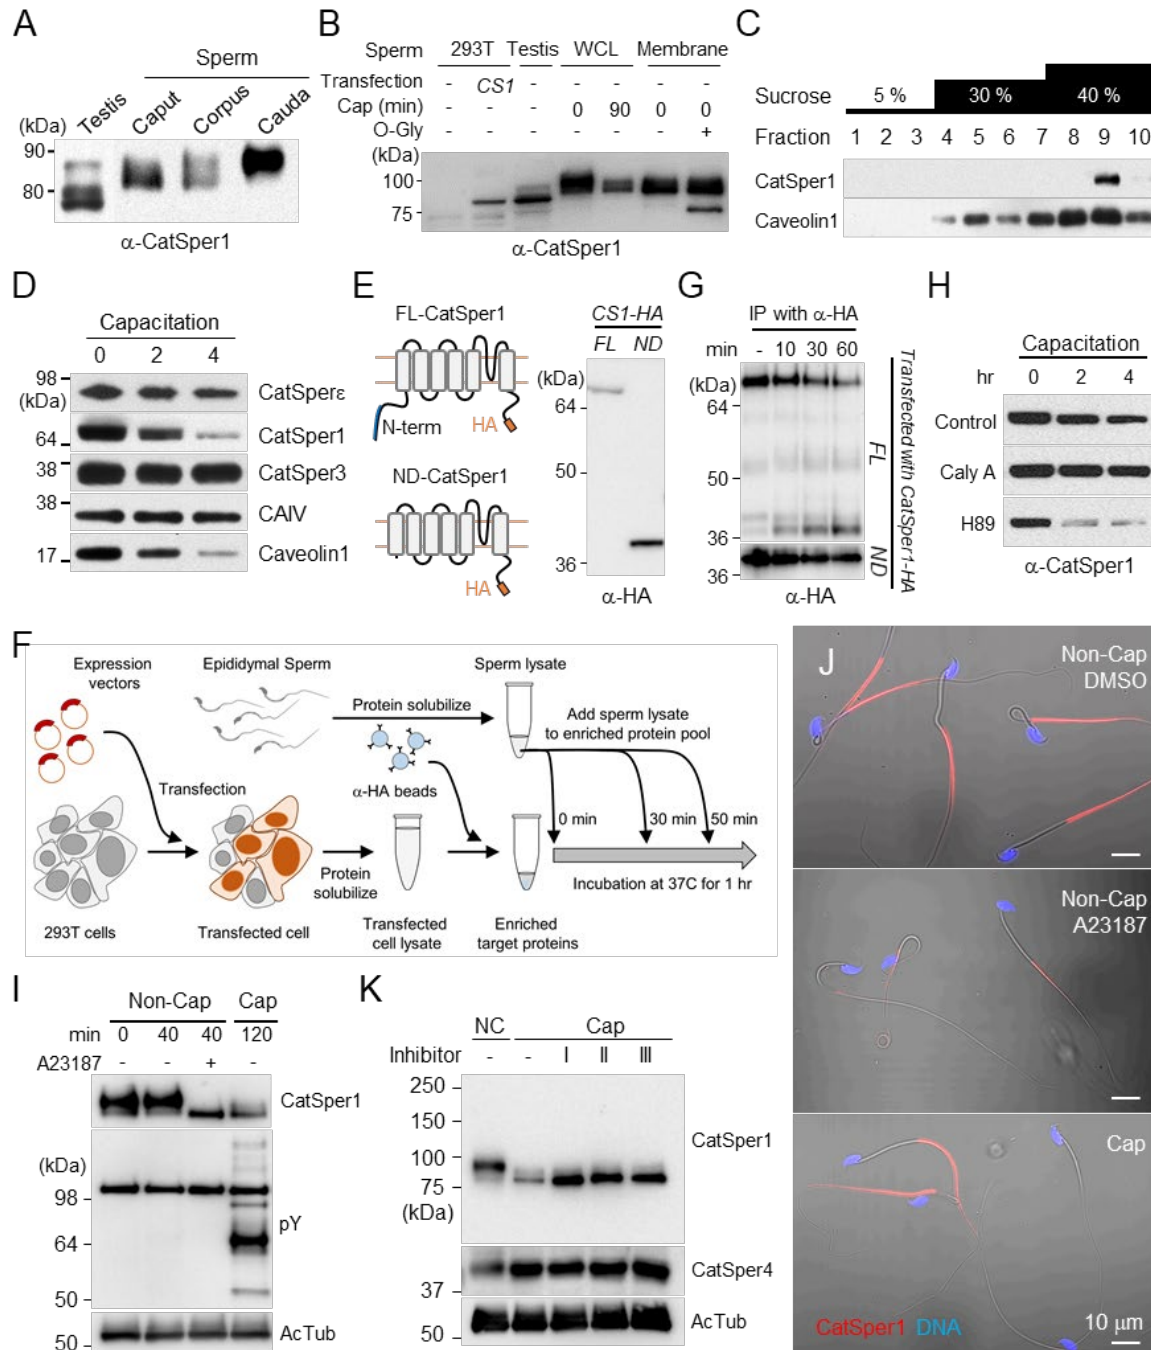

870  
871  
872  
873  
874  
875  
876  
877  
878  
879  
880

**Figure 1. CatSper1 is specifically processed during *in vitro* capacitation.** (A-B) CatSper1 undergoes post-translational modification during spermiogenesis and epididymal maturation. (A) A gradual decrease in electrophoretic mobility of CatSper1 is observed by Western blot analysis. (B) CatSper1 from sperm membrane fraction are shifted by O-glycosidase (O-Gly). (C) CatSper resides in lipid rafts subdomains of the plasma membrane in mature sperm. Solubilized sperm proteins were fractionized by discontinuous sucrose density gradient (5, 30, and 40%) centrifugation. (D) CatSper1 is degraded during the late stage of capacitation. Protein expression levels of CatSper1 and caveolin-1, but not CatSper3, CatSperε, or carbonic anhydrase 4 (CAIV) are altered by *in vitro* capacitation. (E-G) CatSper1 is cleaved within the N-terminal domain (NTD). (E) A cartoon of full-length (FL, *top*) and N-terminal truncated (ND, *bottom*)

881 recombinant CatSper1 protein expressed in the study (*left*). Both proteins are tagged with HA at their  
882 respective C-termini (orange). CatSper1 antibody used in this study is raised against the 1-150 aa region  
883 of CatSper1 (blue, [Ren et al., 2001](#)). Detection of recombinant FL-CatSper1 and ND-CatSper1 expressed  
884 in 293T cells (*right*). (F) A cartoon of the experimental scheme to test NTD truncation of CatSper1. FL-  
885 CatSper1 and ND-CatSper1 expressed in 293T cells were solubilized and pulled-down using agarose resin  
886 conjugated with HA antibody. The enriched recombinant proteins were incubated with solubilized sperm  
887 lysates at 37 °C for 0, 10, 30, and 60 min and subjected to immunoblot. (G) FL-CatSper1 is cleaved at NTD  
888 by solubilized sperm lysate. FL-CatSper1 (arrow) decreases while truncated form (arrowhead) increases  
889 by incubation with solubilized sperm lysates (*top*). ND-CatSper1 proteins remain largely unchanged under  
890 the same conditions (*bottom*). Immunoblotting were performed with HA antibody (E and G). (H)  
891 Capacitation-associated CatSper1 degradation is regulated by phosphorylation. CatSper1 degradation is  
892 accelerated by PKA inhibition. A PKA inhibitor, H89 (50 μM), enhances capacitation-associated CatSper1  
893 degradation. A protein phosphatase1 inhibitor, calyculin A (Caly A, 0.1 μM), prevents the CatSper1  
894 degradation during sperm capacitation *in vitro*. (I-J) Ca<sup>2+</sup> influx accelerates CatSper1 degradation. (I)  
895 CatSper activation during capacitation and Ca<sup>2+</sup> ionophore treatment (A23187, 10 μM) facilitates the  
896 CatSper1 cleavage. (J) Immunodetection of CatSper1 in the spermatozoa incubated under the conditions  
897 used in (I). The extent of CatSper1 degradation is heterogeneous in the capacitated sperm cells (*bottom*)  
898 compared with A23187-treated uncapacitated sperm cells (middle). (K) Capacitation-associated CatSper1  
899 degradation is blocked by calpain inhibitors (I, II, and III). 20 μM of each calpain inhibitor was treated to  
900 sperm during capacitation.

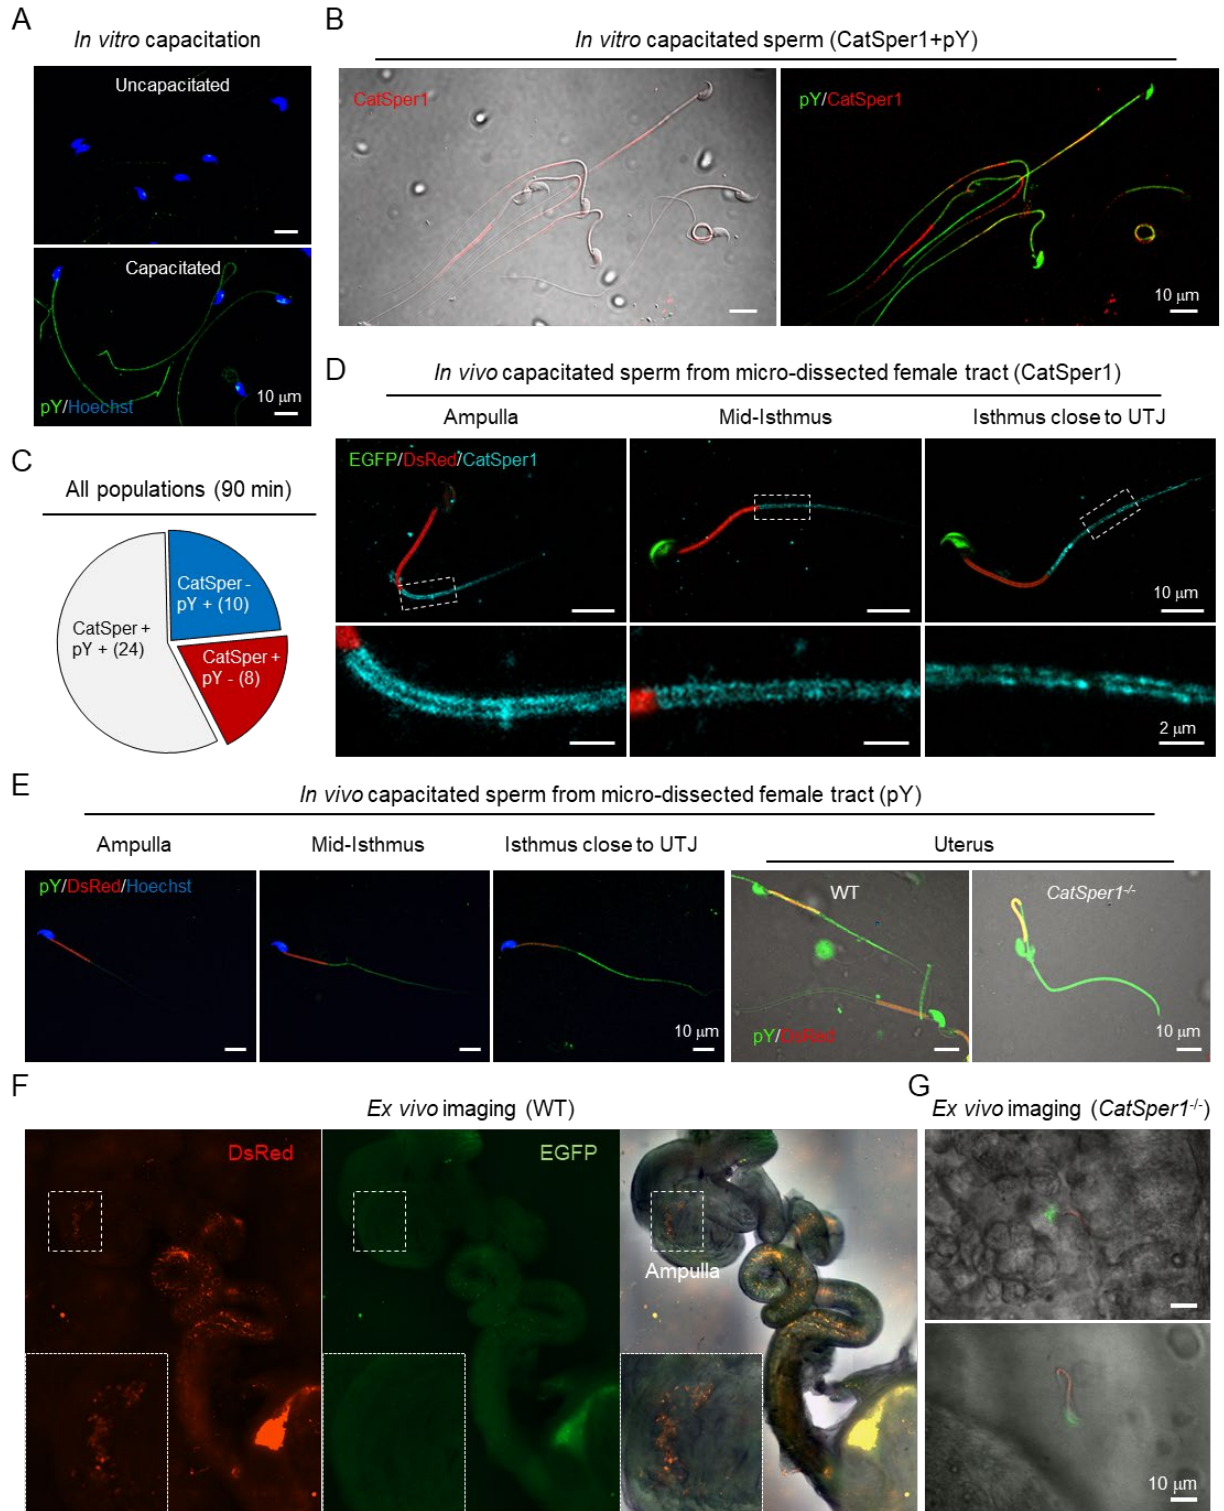

901  
902  
903  
904  
905  
906  
907

**Figure 2. Sperm cells become heterogeneous functionally and molecularly along the female tract.** (A) Immunodetection of pY from *in vitro* capacitated sperm. (B) Sperm cells that maintain intact CatSper1 during *in vitro* capacitation exhibit reduced pY development. An image of CatSper1 (red) is merged with the corresponding DIC image (left) or pY image (right). (C) A pie chart represents expression patterns of CatSper1 and pY in individual sperm capacitated *in vitro*. Sperm number in each group are indicated in



908 parentheses. *Su9-DsRed;Acr-EGFP* WT and *Su9-DsRed;Acr-EGFP CatSper1<sup>-/-</sup>* mice (Chung et al., 2014)  
909 were used for mating. Sperm were capacitated *in vitro* for 90 min (A-B). (D-E) Sperm cells capacitated *in*  
910 *vivo* show distinct molecular characteristics along the female tract. The degrees of CatSper1 processing  
911 (D) and development of tyrosine phosphorylation (pY) (E) during *in vivo* capacitation were analyzed by  
912 immunostaining of the sperm cells at different regions of microdissected female tracts 8h post-coitus. The  
913 indicated regions are magnified to show distributions of CatSper1 in sperm cells. Sperm cells that arrived  
914 at the ampulla are acrosome reacted and CatSper1 intact (D) and lack pY development (E). Gradual  
915 increase of pY is observed in the oviductal sperm located closer to UTJ. Sperm cells that fail to pass UTJ  
916 and reside in the uterus show heterogeneous patterns of pY. *CatSper1<sup>-/-</sup>* sperm recovered from the uterus  
917 of a mated female show robust elevation of pY. (F-G) WT sperm cells, but not *CatSper1<sup>-/-</sup>* sperm, that arrive  
918 at the ampulla are acrosome reacted. *Ex vivo* imaging of female tracts mated with WT (F) and *CatSper1<sup>-/-</sup>*  
919 (G) males (8 h post-coitus). (F) WT sperm cells are acrosome-reacted at the ampulla (EGFP-negative,  
920 *inset*). (G) A few *CatSper1<sup>-/-</sup>* sperm cells observed at ampulla have intact acrosome (EGFP-positive). Red,  
921 DsRed; green, EGFP; Merged, fluorescent images merged with the corresponding DIC image.

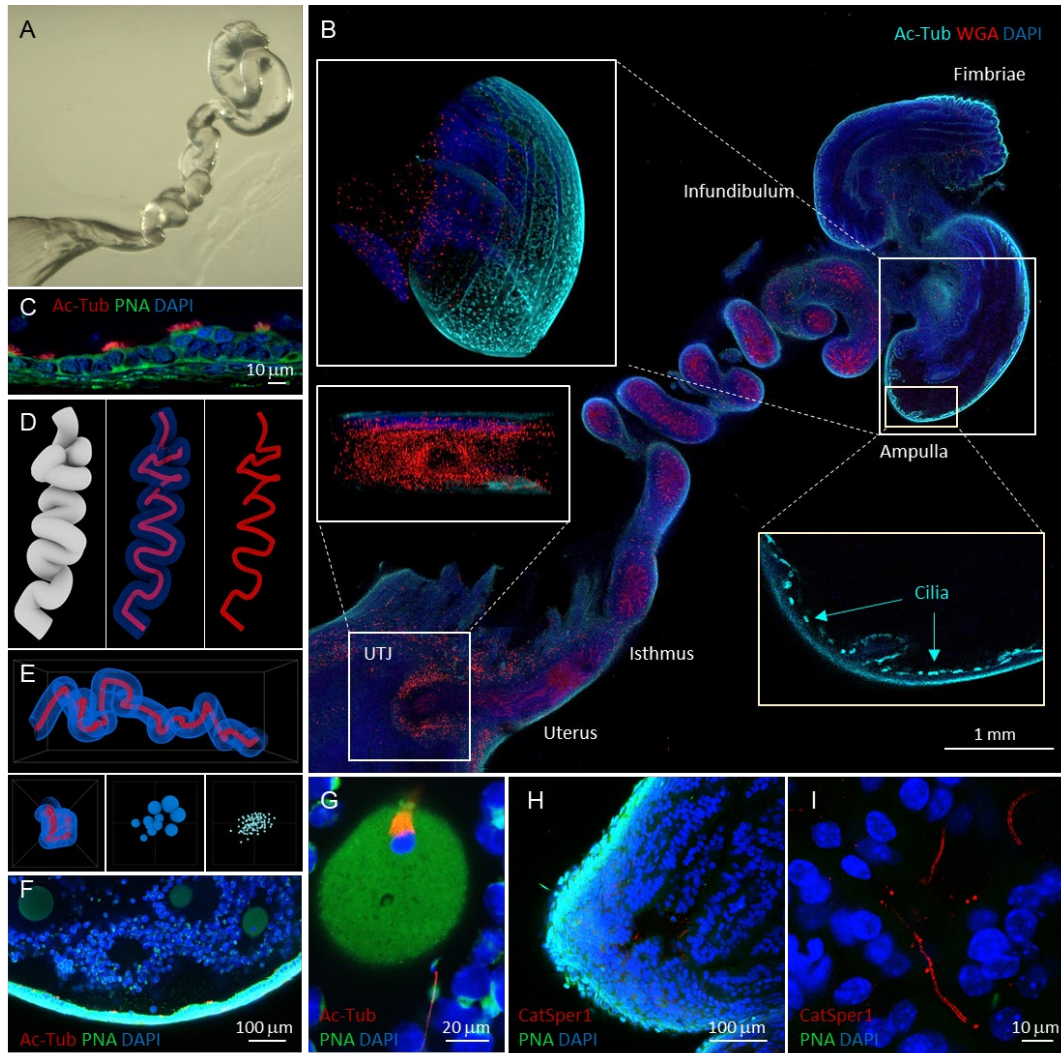

922

923 **Figure 3. Tissue clearing preserves morphology of female reproductive tract and enables molecular**  
924 **imaging and post-processing of gametes *in situ*.** (A) Refractive index-matched cleared mouse female  
925 reproductive tract by CLARITY-based tissue clearing. (B) Optical imaging of the cleared female  
926 reproductive tract stained by WGA (red), Ac-Tub antibody (cyan) and DAPI (blue), 100x. Insets show cilia  
927 stained by Ac-Tub antibody in 2D (*lower right*), a 3D (*upper left*) projection of the ampulla, and a UTJ cross-  
928 section (*lower left*). (C) Details of the ampullar epithelium stained by PNA (green), Ac-Tub antibody (red)  
929 and DAPI (blue), 400x. (D) 3D digital image reconstruction of the oviduct representing different 3D images  
930 rendered for oviductal surface (*left*) and central lumen of oviduct with (*middle*) or without (*right*) oviductal  
931 volume information. (E) Morphometric and fluorescent signal quantification analysis of the oviduct showing  
932 the morphometric meshwork representation of the 3D volumetric data from the oviduct imaging (*upper*), the  
933 corresponding side view (*lower left*) and the non-numerical visual representations of the basic volumetric  
934 (*lower middle*) and fluorescent (*lower right*) properties. (F) A fluorescent image showing a closer look of the  
935 cleared ampulla with oocytes (oocyte magnified in the panel G on the right-most side), 100x. (G) An oocyte  
936 with the meiotic spindle; a sperm cell is approaching the *zona pellucida* directly inside the ampulla, PNA  
937 (green), anti-AcTub antibody (red) and DAPI (blue), 630x. (H) A tile-scanned confocal image of epithelium  
938 of the cleared ampulla (8h post coitus) stained by anti-CatSper1 antibody (red), PNA (green) and DAPI  
939 (blue), 100x. (I) Details of the sperm stained directly inside the ampulla by anti-CatSper1 antibody (red).  
940 Two linear CatSper domains are clearly recognizable by confocal imaging. Cell nuclei are stained with DAPI  
941 (blue); acrosomes are stained with PNA (green). See also Videos 3-7.

942

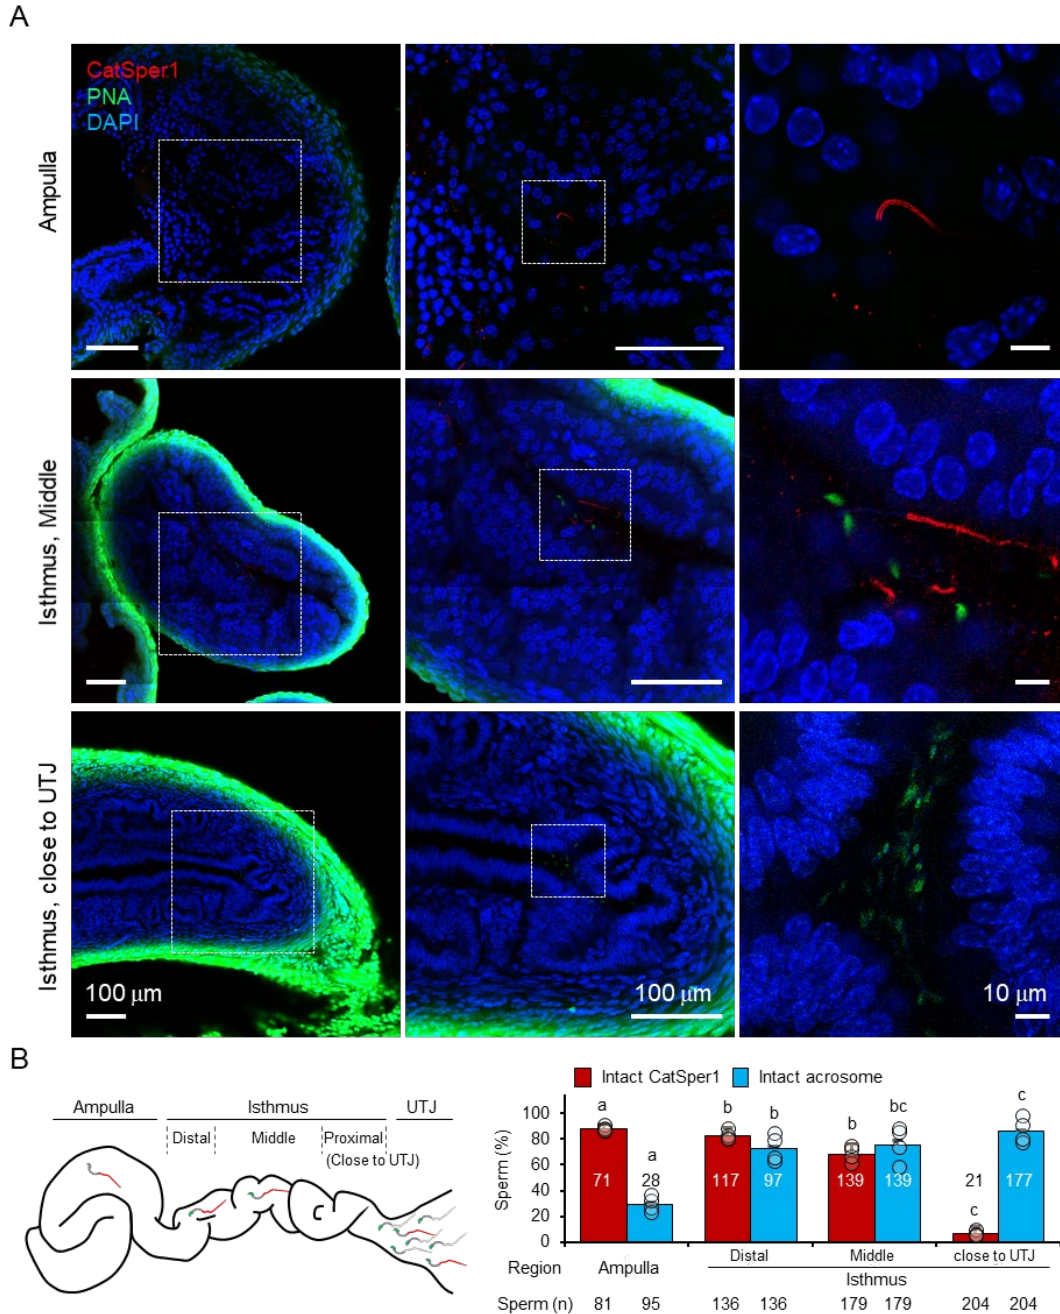

943

944 **Figure 4. *In situ* molecular imaging of sperm reveals the changes in acrosomal status and CatSper1**  
 945 **fluorescent patterns during capacitation along the female tract. (A)** Fluorescent confocal microscope  
 946 images of acrosome and CatSper1 fluorescent patterns from 3 different regions along the cleared female  
 947 reproductive tract (Ampulla, *upper*; Middle isthmus, *middle*; Proximal isthmus, *lower*) with different  
 948 magnifications of the corresponding areas. (B) A cartoon image of the female reproductive tract showing  
 949 the approximate boundaries between the regions of interest (*left*) used as grouping variable in the  
 950 subsequent quantification (*right*). The total number of CatSper1-intact sperm (red columns), or acrosome-  
 951 intact sperm (blue columns), that were counted is shown (bottom). Four independent experiments were  
 952 performed (n=4). Circles indicate the proportion of sperm cells in each examined site from an independent  
 953 experiment. Means with different letters indicate significant difference ( $P < 0.05$ ) in pairwise comparison  
 954 between the different regions of female tract. Data is represented to mean  $\pm$  S.E.M. See also Video 8.

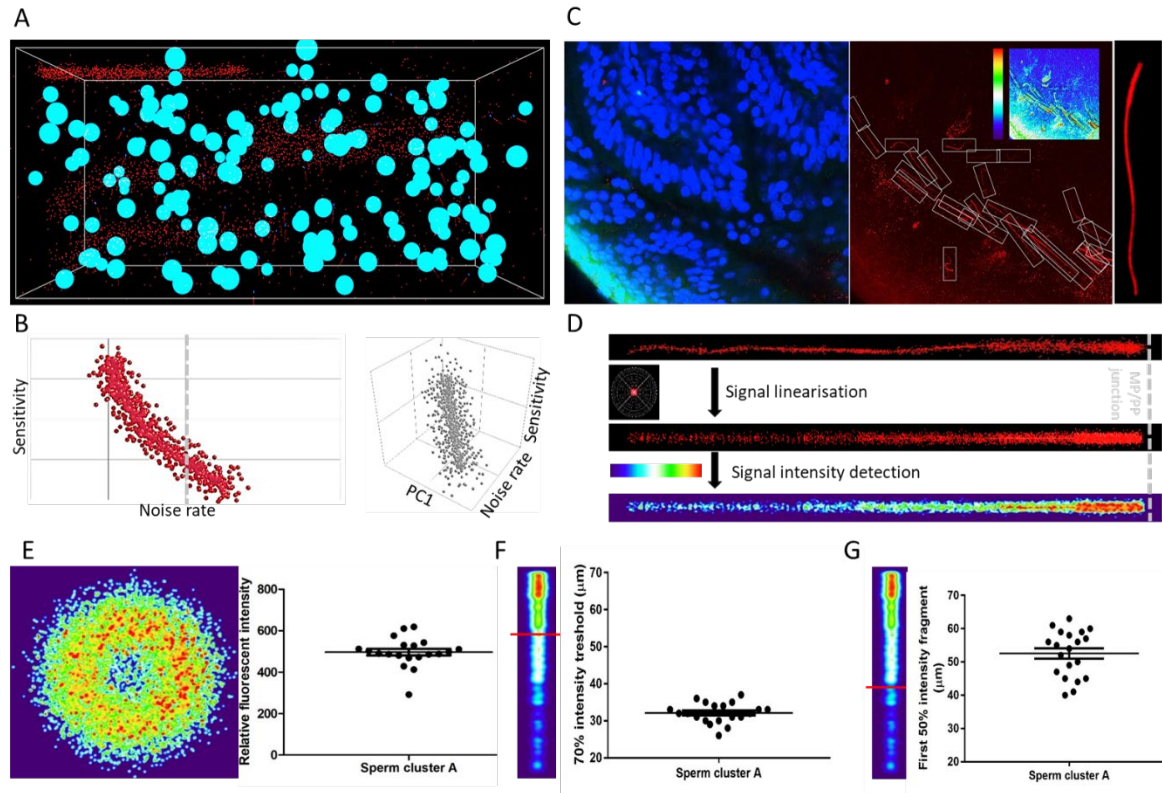

955

956 **Figure 5. ANN automatically detects fluorescent patterns from 3D volume images of a cleared**  
957 **female reproductive tract, enabling isolation and statistical comparisons of sperm cells.** (A) A 3D  
958 training environment for ANN emulating sperm cells, somatic nuclei, and noise. (B) Examples of ANN  
959 training statistics showing the trend of correlation between the noise rate in the training environment and  
960 the sensitivity of ANN (*left*), and a three-dimensional correlation trend between noise rate in the training  
961 environment, sensitivity and principal component (PC1) consisting of sperm and nuclei abundancies (*right*).  
962 (C) A microscopic focal plane image of the sperm cluster inside the cleared female reproductive tract used  
963 for evaluating the ANN performance in real sample (*left*), its superposition in the CatSper1 channel with the  
964 individual sperm tails in detection frames with the inset analytical heatmap (*middle*) and the magnification  
965 of one of the analytical frames with a CatSper1-positive sperm tail (*right*). (D) Representation of the  
966 fluorescent signal in the sperm tail after normalizing individual voxels to signal from the corresponding  
967 sperm nucleus (*upper*), after applying linearization and overlay algorithms (*middle*), and heatmap  
968 representation of the relative fluorescent intensities among multiple sperm tail (*lower*). (E) Analysis of the  
969 relative intensities of the fluorescent signals from sperm located inside the mid-isthmus cleared female  
970 reproductive oviduct. The left panel represents the intensity of CatSper1 fluorescent signal in the cross-  
971 section of one sperm tail from 20 individual sperm under analysis (middle isthmus). The right panel show  
972 the distribution of relative fluorescent intensity of the 20 sperm. (F) Analysis of the continuity of the  
973 fluorescent signal along the individual sperm tails; the first fragment of the 70% signal intensity decreases  
974 from the midpiece/principal piece interface. (G) The first fragment of the 50% signal intensity decreases  
975 from the midpiece/principal piece interface. See also Video 9.

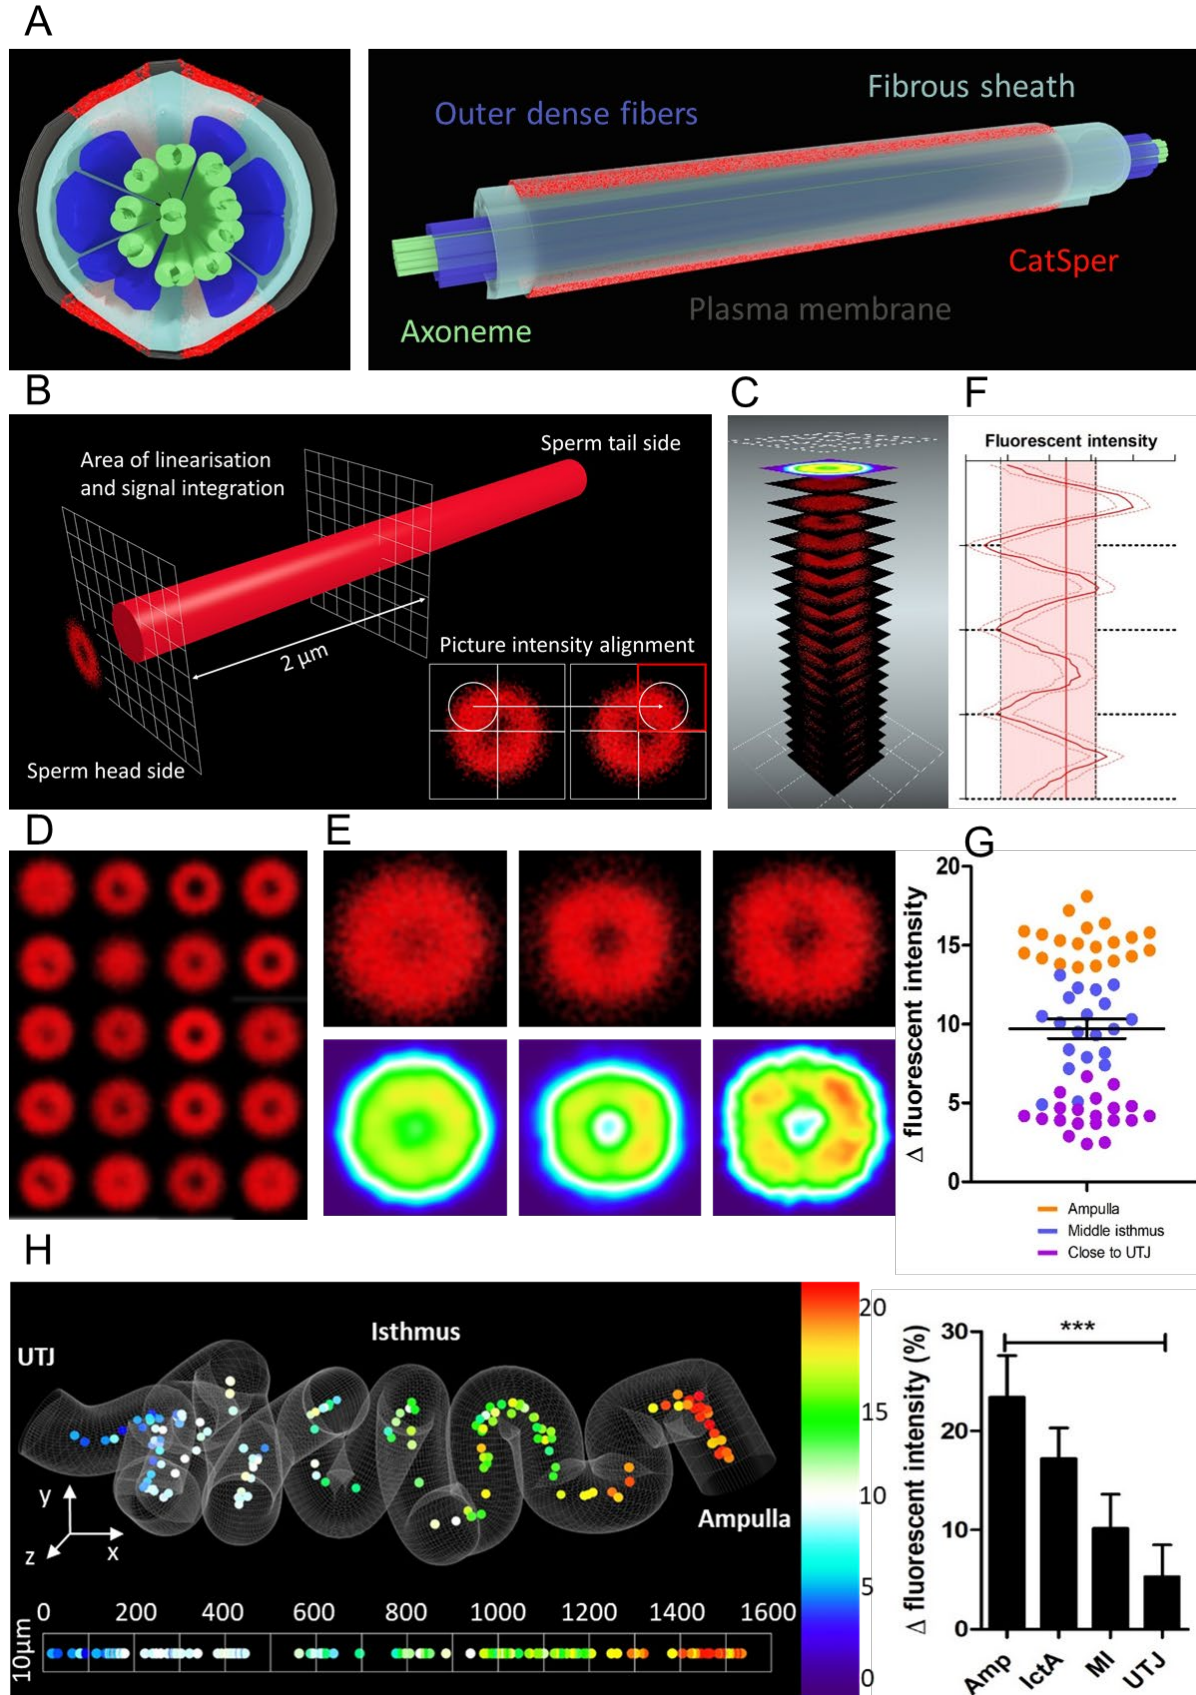

977 **Figure 6. ANN assessment of quadrilateral CatSper nanodomains and  $\Delta$  fluorescent intensity in**  
978 **sperm population along the cleared female tract conforms to findings by other approaches used**  
979 **in this study.** (A) 3D perspective schematic views of quadrilateral CatSper nanodomains. A cross-section  
980 (*left*). A side view (*right*). (B) A schematic diagram describing the image processing procedure. (C) An  
981 illustration of generating ta heatmap from the pre-processed micrographs. (D) 20 processed micrographs  
982 of the CatSper1 signal from the sperm cluster from middle isthmus of the cleared oviduct. (E) Processed  
983 micrographs (*upper*) and their corresponding heatmaps (*lower*) from 20 spermatozoa from the oviduct  
984 close to UTJ (*left*), middle isthmus (*middle*), and ampulla (*right*). (F) An example of fluorescent intensity  
985 analysis of processed images showing the 4 peaks corresponding to four CatSper1 quadrilateral domains  
986 and calculated averaged  $\Delta$  value (transversal red line). (G) Analysis of the fluorescent intensity  
987 differences ( $\Delta$  values; red area in panel F) among 3 sperm populations from ampulla, middle isthmus and  
988 isthmus close to UTJ. (H) A topological heatmap showing the integrity of the quadrilateral CatSper  
989 domain organization represented by  $\Delta$  values along the morphometrical space of the cleared oviduct (*left*)  
990 with the corresponding inferential statistical analysis of the differences of the signal intensities ( $\Delta$  values,  
991 *right*) among four sperm populations (Amp – Ampulla, IctA – isthmus close to ampulla, MI – middle  
992 isthmus, UTJ – utero-tubal junction).
